# Supplementary material
Source: publisher figshare collection journal article supplement (https://karger.figshare.com/ndownloader/files/39599695)
Supplement: Supplementary file 1 [file 39599695]

## Sheet: Data S1
Skull #	Sample Name / Specimen	Taxon	Cranial Capacity (cm3)	Mean Cranial Capacity (cm3)	Est. Brain Mass (g) Derived from Mean CC (=1.147*Mean CC^0.976)	Mean estimated date (kyr BP), burial date, or geochronological date where available	Sex (1 = female)	Region / Lat. (1 = low = < 30 degrees)	Location (Continent)	Location 2 (Country	Source	Source of estimated brain mass	Date Source (precise date or carbon calibrated if noted; otherwise, based on mean estimate of all sources)	Global Temperature Change (Antarctica Dome C, 100 yr. increments) (mean ∆T ºC)	Global Temperature Change, mean date + 5kyr (Antarctica Dome C, 100 yr. increments) (mean ∆T ºC)	Global Temperature Change, mean date + 10kyr (Antarctica Dome C, 100 yr. increments) (mean ∆T ºC)	Global Temperature Change, mean date + 15kyr (Antarctica Dome C, 100 yr. increments) (mean ∆T ºC)	Global Temperature Change (Antarctica Dome C, 5 kyr increments) (mean ∆T ºC)	Global Temperature Change (Antarctica Dome C, 10 ky increments) (mean ∆T ºC)	Global Temperature Change (Antarctica Dome C, 15 kyr increments) (mean ∆T ºC)	E African (Lake Malawi) Surface Temperature (ºC)	Northwest Africa Humidity Index (African Homo)	Central East Africa Precipitation Index ( African Homo) (with Tangany sample)
297	Manjunath Male Sample Skull Ref 1	AM Homo	1188.2	1188.2	1149.89	0.017	2	1	Asia	India	K. Y. Manjunath, Estimation of cranial volume in dissecting room cadavers. Journal of the Anatomical Society of India. 51, 168-172 (2002).	Stibel (see Methods for formula)	K. Y. Manjunath, Estimation of cranial volume in dissecting room cadavers. Journal of the Anatomical Society of India. 51, 168-172 (2002).	0.973	0.261	-0.317	-4.052	-0.06	-0.36386	-1.01	26.76		-172.5
298	Manjunath Male Sample Skull Ref 2	AM Homo	1302.12	1302.12	1257.37	0.017	2	1	Asia	India	K. Y. Manjunath, Estimation of cranial volume in dissecting room cadavers. Journal of the Anatomical Society of India. 51, 168-172 (2002).	Stibel (see Methods for formula)	K. Y. Manjunath, Estimation of cranial volume in dissecting room cadavers. Journal of the Anatomical Society of India. 51, 168-172 (2002).	0.973	0.261	-0.317	-4.052	-0.06	-0.36386	-1.01	26.76		-172.5
299	Manjunath Male Sample Skull Ref 3	AM Homo	1185.13	1185.13	1146.99	0.017	2	1	Asia	India	K. Y. Manjunath, Estimation of cranial volume in dissecting room cadavers. Journal of the Anatomical Society of India. 51, 168-172 (2002).	Stibel (see Methods for formula)	K. Y. Manjunath, Estimation of cranial volume in dissecting room cadavers. Journal of the Anatomical Society of India. 51, 168-172 (2002).	0.973	0.261	-0.317	-4.052	-0.06	-0.36386	-1.01	26.76		-172.5
300	Manjunath Male Sample Skull Ref 4	AM Homo	1275	1275	1231.8	0.017	2	1	Asia	India	K. Y. Manjunath, Estimation of cranial volume in dissecting room cadavers. Journal of the Anatomical Society of India. 51, 168-172 (2002).	Stibel (see Methods for formula)	K. Y. Manjunath, Estimation of cranial volume in dissecting room cadavers. Journal of the Anatomical Society of India. 51, 168-172 (2002).	0.973	0.261	-0.317	-4.052	-0.06	-0.36386	-1.01	26.76		-172.5
301	Manjunath Male Sample Skull Ref 5	AM Homo	1214.3	1214.3	1174.53	0.017	2	1	Asia	India	K. Y. Manjunath, Estimation of cranial volume in dissecting room cadavers. Journal of the Anatomical Society of India. 51, 168-172 (2002).	Stibel (see Methods for formula)	K. Y. Manjunath, Estimation of cranial volume in dissecting room cadavers. Journal of the Anatomical Society of India. 51, 168-172 (2002).	0.973	0.261	-0.317	-4.052	-0.06	-0.36386	-1.01	26.76		-172.5
302	Manjunath Male Sample Skull Ref 6	AM Homo	1047.02	1047.02	1016.34	0.017	2	1	Asia	India	K. Y. Manjunath, Estimation of cranial volume in dissecting room cadavers. Journal of the Anatomical Society of India. 51, 168-172 (2002).	Stibel (see Methods for formula)	K. Y. Manjunath, Estimation of cranial volume in dissecting room cadavers. Journal of the Anatomical Society of India. 51, 168-172 (2002).	0.973	0.261	-0.317	-4.052	-0.06	-0.36386	-1.01	26.76		-172.5
303	Manjunath Male Sample Skull Ref 7	AM Homo	1211.34	1211.34	1171.74	0.017	2	1	Asia	India	K. Y. Manjunath, Estimation of cranial volume in dissecting room cadavers. Journal of the Anatomical Society of India. 51, 168-172 (2002).	Stibel (see Methods for formula)	K. Y. Manjunath, Estimation of cranial volume in dissecting room cadavers. Journal of the Anatomical Society of India. 51, 168-172 (2002).	0.973	0.261	-0.317	-4.052	-0.06	-0.36386	-1.01	26.76		-172.5
304	Manjunath Male Sample Skull Ref 8	AM Homo	1017	1017	987.89	0.017	2	1	Asia	India	K. Y. Manjunath, Estimation of cranial volume in dissecting room cadavers. Journal of the Anatomical Society of India. 51, 168-172 (2002).	Stibel (see Methods for formula)	K. Y. Manjunath, Estimation of cranial volume in dissecting room cadavers. Journal of the Anatomical Society of India. 51, 168-172 (2002).	0.973	0.261	-0.317	-4.052	-0.06	-0.36386	-1.01	26.76		-172.5
305	Manjunath Male Sample Skull Ref 9	AM Homo	1222.43	1222.43	1182.21	0.017	2	1	Asia	India	K. Y. Manjunath, Estimation of cranial volume in dissecting room cadavers. Journal of the Anatomical Society of India. 51, 168-172 (2002).	Stibel (see Methods for formula)	K. Y. Manjunath, Estimation of cranial volume in dissecting room cadavers. Journal of the Anatomical Society of India. 51, 168-172 (2002).	0.973	0.261	-0.317	-4.052	-0.06	-0.36386	-1.01	26.76		-172.5
306	Manjunath Male Sample Skull Ref 10	AM Homo	1217.36	1217.36	1177.42	0.017	2	1	Asia	India	K. Y. Manjunath, Estimation of cranial volume in dissecting room cadavers. Journal of the Anatomical Society of India. 51, 168-172 (2002).	Stibel (see Methods for formula)	K. Y. Manjunath, Estimation of cranial volume in dissecting room cadavers. Journal of the Anatomical Society of India. 51, 168-172 (2002).	0.973	0.261	-0.317	-4.052	-0.06	-0.36386	-1.01	26.76		-172.5
307	Manjunath Male Sample Skull Ref 11	AM Homo	1172	1172	1134.58	0.017	2	1	Asia	India	K. Y. Manjunath, Estimation of cranial volume in dissecting room cadavers. Journal of the Anatomical Society of India. 51, 168-172 (2002).	Stibel (see Methods for formula)	K. Y. Manjunath, Estimation of cranial volume in dissecting room cadavers. Journal of the Anatomical Society of India. 51, 168-172 (2002).	0.973	0.261	-0.317	-4.052	-0.06	-0.36386	-1.01	26.76		-172.5
308	Manjunath Male Sample Skull Ref 12	AM Homo	1161.2	1161.2	1124.38	0.017	2	1	Asia	India	K. Y. Manjunath, Estimation of cranial volume in dissecting room cadavers. Journal of the Anatomical Society of India. 51, 168-172 (2002).	Stibel (see Methods for formula)	K. Y. Manjunath, Estimation of cranial volume in dissecting room cadavers. Journal of the Anatomical Society of India. 51, 168-172 (2002).	0.973	0.261	-0.317	-4.052	-0.06	-0.36386	-1.01	26.76		-172.5
309	Manjunath Male Sample Skull Ref 13	AM Homo	1251	1251	1209.17	0.017	2	1	Asia	India	K. Y. Manjunath, Estimation of cranial volume in dissecting room cadavers. Journal of the Anatomical Society of India. 51, 168-172 (2002).	Stibel (see Methods for formula)	K. Y. Manjunath, Estimation of cranial volume in dissecting room cadavers. Journal of the Anatomical Society of India. 51, 168-172 (2002).	0.973	0.261	-0.317	-4.052	-0.06	-0.36386	-1.01	26.76		-172.5
310	Manjunath Male Sample Skull Ref 14	AM Homo	1266.21	1266.21	1223.51	0.017	2	1	Asia	India	K. Y. Manjunath, Estimation of cranial volume in dissecting room cadavers. Journal of the Anatomical Society of India. 51, 168-172 (2002).	Stibel (see Methods for formula)	K. Y. Manjunath, Estimation of cranial volume in dissecting room cadavers. Journal of the Anatomical Society of India. 51, 168-172 (2002).	0.973	0.261	-0.317	-4.052	-0.06	-0.36386	-1.01	26.76		-172.5
311	Manjunath Male Sample Skull Ref 15	AM Homo	1166	1166	1128.91	0.017	2	1	Asia	India	K. Y. Manjunath, Estimation of cranial volume in dissecting room cadavers. Journal of the Anatomical Society of India. 51, 168-172 (2002).	Stibel (see Methods for formula)	K. Y. Manjunath, Estimation of cranial volume in dissecting room cadavers. Journal of the Anatomical Society of India. 51, 168-172 (2002).	0.973	0.261	-0.317	-4.052	-0.06	-0.36386	-1.01	26.76		-172.5
312	Manjunath Male Sample Skull Ref 16	AM Homo	1298	1298	1253.49	0.017	2	1	Asia	India	K. Y. Manjunath, Estimation of cranial volume in dissecting room cadavers. Journal of the Anatomical Society of India. 51, 168-172 (2002).	Stibel (see Methods for formula)	K. Y. Manjunath, Estimation of cranial volume in dissecting room cadavers. Journal of the Anatomical Society of India. 51, 168-172 (2002).	0.973	0.261	-0.317	-4.052	-0.06	-0.36386	-1.01	26.76		-172.5
313	Manjunath Male Sample Skull Ref 17	AM Homo	1226.34	1226.34	1185.9	0.017	2	1	Asia	India	K. Y. Manjunath, Estimation of cranial volume in dissecting room cadavers. Journal of the Anatomical Society of India. 51, 168-172 (2002).	Stibel (see Methods for formula)	K. Y. Manjunath, Estimation of cranial volume in dissecting room cadavers. Journal of the Anatomical Society of India. 51, 168-172 (2002).	0.973	0.261	-0.317	-4.052	-0.06	-0.36386	-1.01	26.76		-172.5
314	Manjunath Male Sample Skull Ref 18	AM Homo	1115.04	1115.04	1080.73	0.017	2	1	Asia	India	K. Y. Manjunath, Estimation of cranial volume in dissecting room cadavers. Journal of the Anatomical Society of India. 51, 168-172 (2002).	Stibel (see Methods for formula)	K. Y. Manjunath, Estimation of cranial volume in dissecting room cadavers. Journal of the Anatomical Society of India. 51, 168-172 (2002).	0.973	0.261	-0.317	-4.052	-0.06	-0.36386	-1.01	26.76		-172.5
315	Manjunath Male Sample Skull Ref 19	AM Homo	1029	1029	999.265	0.017	2	1	Asia	India	K. Y. Manjunath, Estimation of cranial volume in dissecting room cadavers. Journal of the Anatomical Society of India. 51, 168-172 (2002).	Stibel (see Methods for formula)	K. Y. Manjunath, Estimation of cranial volume in dissecting room cadavers. Journal of the Anatomical Society of India. 51, 168-172 (2002).	0.973	0.261	-0.317	-4.052	-0.06	-0.36386	-1.01	26.76		-172.5
316	Manjunath Male Sample Skull Ref 20	AM Homo	1158.3	1158.3	1121.64	0.017	2	1	Asia	India	K. Y. Manjunath, Estimation of cranial volume in dissecting room cadavers. Journal of the Anatomical Society of India. 51, 168-172 (2002).	Stibel (see Methods for formula)	K. Y. Manjunath, Estimation of cranial volume in dissecting room cadavers. Journal of the Anatomical Society of India. 51, 168-172 (2002).	0.973	0.261	-0.317	-4.052	-0.06	-0.36386	-1.01	26.76		-172.5
317	Manjunath Male Sample Skull Ref 21	AM Homo	1425.45	1425.45	1373.47	0.017	2	1	Asia	India	K. Y. Manjunath, Estimation of cranial volume in dissecting room cadavers. Journal of the Anatomical Society of India. 51, 168-172 (2002).	Stibel (see Methods for formula)	K. Y. Manjunath, Estimation of cranial volume in dissecting room cadavers. Journal of the Anatomical Society of India. 51, 168-172 (2002).	0.973	0.261	-0.317	-4.052	-0.06	-0.36386	-1.01	26.76		-172.5
318	Manjunath Male Sample Skull Ref 22	AM Homo	1349	1349	1301.53	0.017	2	1	Asia	India	K. Y. Manjunath, Estimation of cranial volume in dissecting room cadavers. Journal of the Anatomical Society of India. 51, 168-172 (2002).	Stibel (see Methods for formula)	K. Y. Manjunath, Estimation of cranial volume in dissecting room cadavers. Journal of the Anatomical Society of India. 51, 168-172 (2002).	0.973	0.261	-0.317	-4.052	-0.06	-0.36386	-1.01	26.76		-172.5
319	Manjunath Male Sample Skull Ref 23	AM Homo	1189	1189	1150.64	0.017	2	1	Asia	India	K. Y. Manjunath, Estimation of cranial volume in dissecting room cadavers. Journal of the Anatomical Society of India. 51, 168-172 (2002).	Stibel (see Methods for formula)	K. Y. Manjunath, Estimation of cranial volume in dissecting room cadavers. Journal of the Anatomical Society of India. 51, 168-172 (2002).	0.973	0.261	-0.317	-4.052	-0.06	-0.36386	-1.01	26.76		-172.5
320	Manjunath Male Sample Skull Ref 24	AM Homo	1109.5	1109.5	1075.49	0.017	2	1	Asia	India	K. Y. Manjunath, Estimation of cranial volume in dissecting room cadavers. Journal of the Anatomical Society of India. 51, 168-172 (2002).	Stibel (see Methods for formula)	K. Y. Manjunath, Estimation of cranial volume in dissecting room cadavers. Journal of the Anatomical Society of India. 51, 168-172 (2002).	0.973	0.261	-0.317	-4.052	-0.06	-0.36386	-1.01	26.76		-172.5
321	Manjunath Male Sample Skull Ref 25	AM Homo	1089.24	1089.24	1056.32	0.017	2	1	Asia	India	K. Y. Manjunath, Estimation of cranial volume in dissecting room cadavers. Journal of the Anatomical Society of India. 51, 168-172 (2002).	Stibel (see Methods for formula)	K. Y. Manjunath, Estimation of cranial volume in dissecting room cadavers. Journal of the Anatomical Society of India. 51, 168-172 (2002).	0.973	0.261	-0.317	-4.052	-0.06	-0.36386	-1.01	26.76		-172.5
322	Manjunath Male Sample Skull Ref 26	AM Homo	1123.4	1123.4	1088.64	0.017	2	1	Asia	India	K. Y. Manjunath, Estimation of cranial volume in dissecting room cadavers. Journal of the Anatomical Society of India. 51, 168-172 (2002).	Stibel (see Methods for formula)	K. Y. Manjunath, Estimation of cranial volume in dissecting room cadavers. Journal of the Anatomical Society of India. 51, 168-172 (2002).	0.973	0.261	-0.317	-4.052	-0.06	-0.36386	-1.01	26.76		-172.5
323	Manjunath Male Sample Skull Ref 27	AM Homo	1235	1235	1194.07	0.017	2	1	Asia	India	K. Y. Manjunath, Estimation of cranial volume in dissecting room cadavers. Journal of the Anatomical Society of India. 51, 168-172 (2002).	Stibel (see Methods for formula)	K. Y. Manjunath, Estimation of cranial volume in dissecting room cadavers. Journal of the Anatomical Society of India. 51, 168-172 (2002).	0.973	0.261	-0.317	-4.052	-0.06	-0.36386	-1.01	26.76		-172.5
324	Manjunath Male Sample Skull Ref 28	AM Homo	1255.09	1255.09	1213.03	0.017	2	1	Asia	India	K. Y. Manjunath, Estimation of cranial volume in dissecting room cadavers. Journal of the Anatomical Society of India. 51, 168-172 (2002).	Stibel (see Methods for formula)	K. Y. Manjunath, Estimation of cranial volume in dissecting room cadavers. Journal of the Anatomical Society of India. 51, 168-172 (2002).	0.973	0.261	-0.317	-4.052	-0.06	-0.36386	-1.01	26.76		-172.5
325	Manjunath Male Sample Skull Ref 29	AM Homo	1283	1283	1239.35	0.017	2	1	Asia	India	K. Y. Manjunath, Estimation of cranial volume in dissecting room cadavers. Journal of the Anatomical Society of India. 51, 168-172 (2002).	Stibel (see Methods for formula)	K. Y. Manjunath, Estimation of cranial volume in dissecting room cadavers. Journal of the Anatomical Society of India. 51, 168-172 (2002).	0.973	0.261	-0.317	-4.052	-0.06	-0.36386	-1.01	26.76		-172.5
326	Manjunath Male Sample Skull Ref 30	AM Homo	1416	1416	1364.59	0.017	2	1	Asia	India	K. Y. Manjunath, Estimation of cranial volume in dissecting room cadavers. Journal of the Anatomical Society of India. 51, 168-172 (2002).	Stibel (see Methods for formula)	K. Y. Manjunath, Estimation of cranial volume in dissecting room cadavers. Journal of the Anatomical Society of India. 51, 168-172 (2002).	0.973	0.261	-0.317	-4.052	-0.06	-0.36386	-1.01	26.76		-172.5
327	Manjunath Male Sample Skull Ref 31	AM Homo	1170	1170	1132.69	0.017	2	1	Asia	India	K. Y. Manjunath, Estimation of cranial volume in dissecting room cadavers. Journal of the Anatomical Society of India. 51, 168-172 (2002).	Stibel (see Methods for formula)	K. Y. Manjunath, Estimation of cranial volume in dissecting room cadavers. Journal of the Anatomical Society of India. 51, 168-172 (2002).	0.973	0.261	-0.317	-4.052	-0.06	-0.36386	-1.01	26.76		-172.5
328	Manjunath Male Sample Skull Ref 32	AM Homo	1271	1271	1228.03	0.017	2	1	Asia	India	K. Y. Manjunath, Estimation of cranial volume in dissecting room cadavers. Journal of the Anatomical Society of India. 51, 168-172 (2002).	Stibel (see Methods for formula)	K. Y. Manjunath, Estimation of cranial volume in dissecting room cadavers. Journal of the Anatomical Society of India. 51, 168-172 (2002).	0.973	0.261	-0.317	-4.052	-0.06	-0.36386	-1.01	26.76		-172.5
329	Manjunath Male Sample Skull Ref 33	AM Homo	1396	1396	1345.77	0.017	2	1	Asia	India	K. Y. Manjunath, Estimation of cranial volume in dissecting room cadavers. Journal of the Anatomical Society of India. 51, 168-172 (2002).	Stibel (see Methods for formula)	K. Y. Manjunath, Estimation of cranial volume in dissecting room cadavers. Journal of the Anatomical Society of India. 51, 168-172 (2002).	0.973	0.261	-0.317	-4.052	-0.06	-0.36386	-1.01	26.76		-172.5
330	Manjunath Female Sample Skull Ref 1	AM Homo	1142	1142	1106.23	0.017	1	1	Asia	India	K. Y. Manjunath, Estimation of cranial volume in dissecting room cadavers. Journal of the Anatomical Society of India. 51, 168-172 (2002).	Stibel (see Methods for formula)	K. Y. Manjunath, Estimation of cranial volume in dissecting room cadavers. Journal of the Anatomical Society of India. 51, 168-172 (2002).	0.973	0.261	-0.317	-4.052	-0.06	-0.36386	-1.01	26.76		-172.5
331	Manjunath Female Sample Skull Ref 2	AM Homo	1299	1299	1254.43	0.017	1	1	Asia	India	K. Y. Manjunath, Estimation of cranial volume in dissecting room cadavers. Journal of the Anatomical Society of India. 51, 168-172 (2002).	Stibel (see Methods for formula)	K. Y. Manjunath, Estimation of cranial volume in dissecting room cadavers. Journal of the Anatomical Society of India. 51, 168-172 (2002).	0.973	0.261	-0.317	-4.052	-0.06	-0.36386	-1.01	26.76		-172.5
332	Manjunath Female Sample Skull Ref 3	AM Homo	975.14	975.14	948.184	0.017	1	1	Asia	India	K. Y. Manjunath, Estimation of cranial volume in dissecting room cadavers. Journal of the Anatomical Society of India. 51, 168-172 (2002).	Stibel (see Methods for formula)	K. Y. Manjunath, Estimation of cranial volume in dissecting room cadavers. Journal of the Anatomical Society of India. 51, 168-172 (2002).	0.973	0.261	-0.317	-4.052	-0.06	-0.36386	-1.01	26.76		-172.5
333	Manjunath Female Sample Skull Ref 4	AM Homo	1116	1116	1081.64	0.017	1	1	Asia	India	K. Y. Manjunath, Estimation of cranial volume in dissecting room cadavers. Journal of the Anatomical Society of India. 51, 168-172 (2002).	Stibel (see Methods for formula)	K. Y. Manjunath, Estimation of cranial volume in dissecting room cadavers. Journal of the Anatomical Society of India. 51, 168-172 (2002).	0.973	0.261	-0.317	-4.052	-0.06	-0.36386	-1.01	26.76		-172.5
334	Manjunath Female Sample Skull Ref 5	AM Homo	1169	1169	1131.75	0.017	1	1	Asia	India	K. Y. Manjunath, Estimation of cranial volume in dissecting room cadavers. Journal of the Anatomical Society of India. 51, 168-172 (2002).	Stibel (see Methods for formula)	K. Y. Manjunath, Estimation of cranial volume in dissecting room cadavers. Journal of the Anatomical Society of India. 51, 168-172 (2002).	0.973	0.261	-0.317	-4.052	-0.06	-0.36386	-1.01	26.76		-172.5
335	Manjunath Female Sample Skull Ref 6	AM Homo	1128.14	1128.14	1093.12	0.017	1	1	Asia	India	K. Y. Manjunath, Estimation of cranial volume in dissecting room cadavers. Journal of the Anatomical Society of India. 51, 168-172 (2002).	Stibel (see Methods for formula)	K. Y. Manjunath, Estimation of cranial volume in dissecting room cadavers. Journal of the Anatomical Society of India. 51, 168-172 (2002).	0.973	0.261	-0.317	-4.052	-0.06	-0.36386	-1.01	26.76		-172.5
336	Manjunath Female Sample Skull Ref 7	AM Homo	1165.41	1165.41	1128.36	0.017	1	1	Asia	India	K. Y. Manjunath, Estimation of cranial volume in dissecting room cadavers. Journal of the Anatomical Society of India. 51, 168-172 (2002).	Stibel (see Methods for formula)	K. Y. Manjunath, Estimation of cranial volume in dissecting room cadavers. Journal of the Anatomical Society of India. 51, 168-172 (2002).	0.973	0.261	-0.317	-4.052	-0.06	-0.36386	-1.01	26.76		-172.5
337	Manjunath Female Sample Skull Ref 8	AM Homo	1037	1037	1006.85	0.017	1	1	Asia	India	K. Y. Manjunath, Estimation of cranial volume in dissecting room cadavers. Journal of the Anatomical Society of India. 51, 168-172 (2002).	Stibel (see Methods for formula)	K. Y. Manjunath, Estimation of cranial volume in dissecting room cadavers. Journal of the Anatomical Society of India. 51, 168-172 (2002).	0.973	0.261	-0.317	-4.052	-0.06	-0.36386	-1.01	26.76		-172.5
338	Manjunath Female Sample Skull Ref 9	AM Homo	1040	1040	1009.69	0.017	1	1	Asia	India	K. Y. Manjunath, Estimation of cranial volume in dissecting room cadavers. Journal of the Anatomical Society of India. 51, 168-172 (2002).	Stibel (see Methods for formula)	K. Y. Manjunath, Estimation of cranial volume in dissecting room cadavers. Journal of the Anatomical Society of India. 51, 168-172 (2002).	0.973	0.261	-0.317	-4.052	-0.06	-0.36386	-1.01	26.76		-172.5
339	Manjunath Female Sample Skull Ref 10	AM Homo	1095	1095	1061.77	0.017	1	1	Asia	India	K. Y. Manjunath, Estimation of cranial volume in dissecting room cadavers. Journal of the Anatomical Society of India. 51, 168-172 (2002).	Stibel (see Methods for formula)	K. Y. Manjunath, Estimation of cranial volume in dissecting room cadavers. Journal of the Anatomical Society of India. 51, 168-172 (2002).	0.973	0.261	-0.317	-4.052	-0.06	-0.36386	-1.01	26.76		-172.5
340	Manjunath Female Sample Skull Ref 11	AM Homo	1012	1012	983.15	0.017	1	1	Asia	India	K. Y. Manjunath, Estimation of cranial volume in dissecting room cadavers. Journal of the Anatomical Society of India. 51, 168-172 (2002).	Stibel (see Methods for formula)	K. Y. Manjunath, Estimation of cranial volume in dissecting room cadavers. Journal of the Anatomical Society of India. 51, 168-172 (2002).	0.973	0.261	-0.317	-4.052	-0.06	-0.36386	-1.01	26.76		-172.5
341	Manjunath Female Sample Skull Ref 12	AM Homo	1189	1189	1150.64	0.017	1	1	Asia	India	K. Y. Manjunath, Estimation of cranial volume in dissecting room cadavers. Journal of the Anatomical Society of India. 51, 168-172 (2002).	Stibel (see Methods for formula)	K. Y. Manjunath, Estimation of cranial volume in dissecting room cadavers. Journal of the Anatomical Society of India. 51, 168-172 (2002).	0.973	0.261	-0.317	-4.052	-0.06	-0.36386	-1.01	26.76		-172.5
342	Manjunath Female Sample Skull Ref 13	AM Homo	1086.4	1086.4	1053.63	0.017	1	1	Asia	India	K. Y. Manjunath, Estimation of cranial volume in dissecting room cadavers. Journal of the Anatomical Society of India. 51, 168-172 (2002).	Stibel (see Methods for formula)	K. Y. Manjunath, Estimation of cranial volume in dissecting room cadavers. Journal of the Anatomical Society of India. 51, 168-172 (2002).	0.973	0.261	-0.317	-4.052	-0.06	-0.36386	-1.01	26.76		-172.5
343	Manjunath Female Sample Skull Ref 14	AM Homo	1204.11	1204.11	1164.91	0.017	1	1	Asia	India	K. Y. Manjunath, Estimation of cranial volume in dissecting room cadavers. Journal of the Anatomical Society of India. 51, 168-172 (2002).	Stibel (see Methods for formula)	K. Y. Manjunath, Estimation of cranial volume in dissecting room cadavers. Journal of the Anatomical Society of India. 51, 168-172 (2002).	0.973	0.261	-0.317	-4.052	-0.06	-0.36386	-1.01	26.76		-172.5
344	Manjunath Female Sample Skull Ref 15	AM Homo	1055	1055	1023.9	0.017	1	1	Asia	India	K. Y. Manjunath, Estimation of cranial volume in dissecting room cadavers. Journal of the Anatomical Society of India. 51, 168-172 (2002).	Stibel (see Methods for formula)	K. Y. Manjunath, Estimation of cranial volume in dissecting room cadavers. Journal of the Anatomical Society of India. 51, 168-172 (2002).	0.973	0.261	-0.317	-4.052	-0.06	-0.36386	-1.01	26.76		-172.5
345	Manjunath Female Sample Skull Ref 16	AM Homo	1270.24	1270.24	1227.31	0.017	1	1	Asia	India	K. Y. Manjunath, Estimation of cranial volume in dissecting room cadavers. Journal of the Anatomical Society of India. 51, 168-172 (2002).	Stibel (see Methods for formula)	K. Y. Manjunath, Estimation of cranial volume in dissecting room cadavers. Journal of the Anatomical Society of India. 51, 168-172 (2002).	0.973	0.261	-0.317	-4.052	-0.06	-0.36386	-1.01	26.76		-172.5
346	Manjunath Female Sample Skull Ref 17	AM Homo	1052	1052	1021.06	0.017	1	1	Asia	India	K. Y. Manjunath, Estimation of cranial volume in dissecting room cadavers. Journal of the Anatomical Society of India. 51, 168-172 (2002).	Stibel (see Methods for formula)	K. Y. Manjunath, Estimation of cranial volume in dissecting room cadavers. Journal of the Anatomical Society of India. 51, 168-172 (2002).	0.973	0.261	-0.317	-4.052	-0.06	-0.36386	-1.01	26.76		-172.5
488	271	AM Homo	1537	1537	1478.28	0.039	2	2	Asia	Southern Chinese	P. Brown, Recent human evolution in East Asia and Australasia. Philosophical Transactions of the Royal Society. 337, 235-242 (1992). (updated data file provided by Peter Brown)	Stibel (see Methods for formula)	P. Brown, Recent human evolution in East Asia and Australasia. Philosophical Transactions of the Royal Society. 337, 235-242 (1992). (updated data file provided by Peter Brown)	0.973	0.261	-0.317	-4.052	-0.06	-0.36386	-1.01	26.76		-172.5
489	261	AM Homo	1337	1337	1290.23	0.039	2	2	Asia	Southern Chinese	P. Brown, Recent human evolution in East Asia and Australasia. Philosophical Transactions of the Royal Society. 337, 235-242 (1992). (updated data file provided by Peter Brown)	Stibel (see Methods for formula)	P. Brown, Recent human evolution in East Asia and Australasia. Philosophical Transactions of the Royal Society. 337, 235-242 (1992). (updated data file provided by Peter Brown)	0.973	0.261	-0.317	-4.052	-0.06	-0.36386	-1.01	26.76		-172.5
490	199	AM Homo	1389	1389	1339.19	0.039	2	2	Asia	Southern Chinese	P. Brown, Recent human evolution in East Asia and Australasia. Philosophical Transactions of the Royal Society. 337, 235-242 (1992). (updated data file provided by Peter Brown)	Stibel (see Methods for formula)	P. Brown, Recent human evolution in East Asia and Australasia. Philosophical Transactions of the Royal Society. 337, 235-242 (1992). (updated data file provided by Peter Brown)	0.973	0.261	-0.317	-4.052	-0.06	-0.36386	-1.01	26.76		-172.5
491	130	AM Homo	1512	1512	1454.81	0.039	2	2	Asia	Southern Chinese	P. Brown, Recent human evolution in East Asia and Australasia. Philosophical Transactions of the Royal Society. 337, 235-242 (1992). (updated data file provided by Peter Brown)	Stibel (see Methods for formula)	P. Brown, Recent human evolution in East Asia and Australasia. Philosophical Transactions of the Royal Society. 337, 235-242 (1992). (updated data file provided by Peter Brown)	0.973	0.261	-0.317	-4.052	-0.06	-0.36386	-1.01	26.76		-172.5
492	126	AM Homo	1458	1458	1404.08	0.039	2	2	Asia	Southern Chinese	P. Brown, Recent human evolution in East Asia and Australasia. Philosophical Transactions of the Royal Society. 337, 235-242 (1992). (updated data file provided by Peter Brown)	Stibel (see Methods for formula)	P. Brown, Recent human evolution in East Asia and Australasia. Philosophical Transactions of the Royal Society. 337, 235-242 (1992). (updated data file provided by Peter Brown)	0.973	0.261	-0.317	-4.052	-0.06	-0.36386	-1.01	26.76		-172.5
493	164	AM Homo	1632	1632	1567.39	0.039	2	2	Asia	Southern Chinese	P. Brown, Recent human evolution in East Asia and Australasia. Philosophical Transactions of the Royal Society. 337, 235-242 (1992). (updated data file provided by Peter Brown)	Stibel (see Methods for formula)	P. Brown, Recent human evolution in East Asia and Australasia. Philosophical Transactions of the Royal Society. 337, 235-242 (1992). (updated data file provided by Peter Brown)	0.973	0.261	-0.317	-4.052	-0.06	-0.36386	-1.01	26.76		-172.5
494	159	AM Homo	1313	1313	1267.62	0.039	2	2	Asia	Southern Chinese	P. Brown, Recent human evolution in East Asia and Australasia. Philosophical Transactions of the Royal Society. 337, 235-242 (1992). (updated data file provided by Peter Brown)	Stibel (see Methods for formula)	P. Brown, Recent human evolution in East Asia and Australasia. Philosophical Transactions of the Royal Society. 337, 235-242 (1992). (updated data file provided by Peter Brown)	0.973	0.261	-0.317	-4.052	-0.06	-0.36386	-1.01	26.76		-172.5
495	226	AM Homo	1605	1605	1542.08	0.039	2	2	Asia	Southern Chinese	P. Brown, Recent human evolution in East Asia and Australasia. Philosophical Transactions of the Royal Society. 337, 235-242 (1992). (updated data file provided by Peter Brown)	Stibel (see Methods for formula)	P. Brown, Recent human evolution in East Asia and Australasia. Philosophical Transactions of the Royal Society. 337, 235-242 (1992). (updated data file provided by Peter Brown)	0.973	0.261	-0.317	-4.052	-0.06	-0.36386	-1.01	26.76		-172.5
496	182	AM Homo	1376	1376	1326.95	0.039	2	2	Asia	Southern Chinese	P. Brown, Recent human evolution in East Asia and Australasia. Philosophical Transactions of the Royal Society. 337, 235-242 (1992). (updated data file provided by Peter Brown)	Stibel (see Methods for formula)	P. Brown, Recent human evolution in East Asia and Australasia. Philosophical Transactions of the Royal Society. 337, 235-242 (1992). (updated data file provided by Peter Brown)	0.973	0.261	-0.317	-4.052	-0.06	-0.36386	-1.01	26.76		-172.5
497	200	AM Homo	1577	1577	1515.82	0.039	2	2	Asia	Southern Chinese	P. Brown, Recent human evolution in East Asia and Australasia. Philosophical Transactions of the Royal Society. 337, 235-242 (1992). (updated data file provided by Peter Brown)	Stibel (see Methods for formula)	P. Brown, Recent human evolution in East Asia and Australasia. Philosophical Transactions of the Royal Society. 337, 235-242 (1992). (updated data file provided by Peter Brown)	0.973	0.261	-0.317	-4.052	-0.06	-0.36386	-1.01	26.76		-172.5
498	39	AM Homo	1575	1575	1513.94	0.039	2	2	Asia	Southern Chinese	P. Brown, Recent human evolution in East Asia and Australasia. Philosophical Transactions of the Royal Society. 337, 235-242 (1992). (updated data file provided by Peter Brown)	Stibel (see Methods for formula)	P. Brown, Recent human evolution in East Asia and Australasia. Philosophical Transactions of the Royal Society. 337, 235-242 (1992). (updated data file provided by Peter Brown)	0.973	0.261	-0.317	-4.052	-0.06	-0.36386	-1.01	26.76		-172.5
499	36	AM Homo	1482	1482	1426.63	0.039	2	2	Asia	Southern Chinese	P. Brown, Recent human evolution in East Asia and Australasia. Philosophical Transactions of the Royal Society. 337, 235-242 (1992). (updated data file provided by Peter Brown)	Stibel (see Methods for formula)	P. Brown, Recent human evolution in East Asia and Australasia. Philosophical Transactions of the Royal Society. 337, 235-242 (1992). (updated data file provided by Peter Brown)	0.973	0.261	-0.317	-4.052	-0.06	-0.36386	-1.01	26.76		-172.5
500	22	AM Homo	1682	1682	1614.25	0.039	2	2	Asia	Southern Chinese	P. Brown, Recent human evolution in East Asia and Australasia. Philosophical Transactions of the Royal Society. 337, 235-242 (1992). (updated data file provided by Peter Brown)	Stibel (see Methods for formula)	P. Brown, Recent human evolution in East Asia and Australasia. Philosophical Transactions of the Royal Society. 337, 235-242 (1992). (updated data file provided by Peter Brown)	0.973	0.261	-0.317	-4.052	-0.06	-0.36386	-1.01	26.76		-172.5
501	20	AM Homo	1619	1619	1555.21	0.039	2	2	Asia	Southern Chinese	P. Brown, Recent human evolution in East Asia and Australasia. Philosophical Transactions of the Royal Society. 337, 235-242 (1992). (updated data file provided by Peter Brown)	Stibel (see Methods for formula)	P. Brown, Recent human evolution in East Asia and Australasia. Philosophical Transactions of the Royal Society. 337, 235-242 (1992). (updated data file provided by Peter Brown)	0.973	0.261	-0.317	-4.052	-0.06	-0.36386	-1.01	26.76		-172.5
502	33	AM Homo	1575	1575	1513.94	0.039	2	2	Asia	Southern Chinese	P. Brown, Recent human evolution in East Asia and Australasia. Philosophical Transactions of the Royal Society. 337, 235-242 (1992). (updated data file provided by Peter Brown)	Stibel (see Methods for formula)	P. Brown, Recent human evolution in East Asia and Australasia. Philosophical Transactions of the Royal Society. 337, 235-242 (1992). (updated data file provided by Peter Brown)	0.973	0.261	-0.317	-4.052	-0.06	-0.36386	-1.01	26.76		-172.5
503	23	AM Homo	1571	1571	1510.19	0.039	2	2	Asia	Southern Chinese	P. Brown, Recent human evolution in East Asia and Australasia. Philosophical Transactions of the Royal Society. 337, 235-242 (1992). (updated data file provided by Peter Brown)	Stibel (see Methods for formula)	P. Brown, Recent human evolution in East Asia and Australasia. Philosophical Transactions of the Royal Society. 337, 235-242 (1992). (updated data file provided by Peter Brown)	0.973	0.261	-0.317	-4.052	-0.06	-0.36386	-1.01	26.76		-172.5
504	21	AM Homo	1776	1776	1702.24	0.039	2	2	Asia	Southern Chinese	P. Brown, Recent human evolution in East Asia and Australasia. Philosophical Transactions of the Royal Society. 337, 235-242 (1992). (updated data file provided by Peter Brown)	Stibel (see Methods for formula)	P. Brown, Recent human evolution in East Asia and Australasia. Philosophical Transactions of the Royal Society. 337, 235-242 (1992). (updated data file provided by Peter Brown)	0.973	0.261	-0.317	-4.052	-0.06	-0.36386	-1.01	26.76		-172.5
505	30	AM Homo	1361	1361	1312.83	0.039	2	2	Asia	Southern Chinese	P. Brown, Recent human evolution in East Asia and Australasia. Philosophical Transactions of the Royal Society. 337, 235-242 (1992). (updated data file provided by Peter Brown)	Stibel (see Methods for formula)	P. Brown, Recent human evolution in East Asia and Australasia. Philosophical Transactions of the Royal Society. 337, 235-242 (1992). (updated data file provided by Peter Brown)	0.973	0.261	-0.317	-4.052	-0.06	-0.36386	-1.01	26.76		-172.5
506	31	AM Homo	1622	1622	1558.02	0.039	2	2	Asia	Southern Chinese	P. Brown, Recent human evolution in East Asia and Australasia. Philosophical Transactions of the Royal Society. 337, 235-242 (1992). (updated data file provided by Peter Brown)	Stibel (see Methods for formula)	P. Brown, Recent human evolution in East Asia and Australasia. Philosophical Transactions of the Royal Society. 337, 235-242 (1992). (updated data file provided by Peter Brown)	0.973	0.261	-0.317	-4.052	-0.06	-0.36386	-1.01	26.76		-172.5
507	17	AM Homo	1388	1388	1338.24	0.039	2	2	Asia	Southern Chinese	P. Brown, Recent human evolution in East Asia and Australasia. Philosophical Transactions of the Royal Society. 337, 235-242 (1992). (updated data file provided by Peter Brown)	Stibel (see Methods for formula)	P. Brown, Recent human evolution in East Asia and Australasia. Philosophical Transactions of the Royal Society. 337, 235-242 (1992). (updated data file provided by Peter Brown)	0.973	0.261	-0.317	-4.052	-0.06	-0.36386	-1.01	26.76		-172.5
508	52	AM Homo	1426	1426	1373.99	0.039	2	2	Asia	Southern Chinese	P. Brown, Recent human evolution in East Asia and Australasia. Philosophical Transactions of the Royal Society. 337, 235-242 (1992). (updated data file provided by Peter Brown)	Stibel (see Methods for formula)	P. Brown, Recent human evolution in East Asia and Australasia. Philosophical Transactions of the Royal Society. 337, 235-242 (1992). (updated data file provided by Peter Brown)	0.973	0.261	-0.317	-4.052	-0.06	-0.36386	-1.01	26.76		-172.5
509	168	AM Homo	1287	1287	1243.12	0.039	2	2	Asia	Southern Chinese	P. Brown, Recent human evolution in East Asia and Australasia. Philosophical Transactions of the Royal Society. 337, 235-242 (1992). (updated data file provided by Peter Brown)	Stibel (see Methods for formula)	P. Brown, Recent human evolution in East Asia and Australasia. Philosophical Transactions of the Royal Society. 337, 235-242 (1992). (updated data file provided by Peter Brown)	0.973	0.261	-0.317	-4.052	-0.06	-0.36386	-1.01	26.76		-172.5
510	79	AM Homo	1404	1404	1353.3	0.039	2	2	Asia	Southern Chinese	P. Brown, Recent human evolution in East Asia and Australasia. Philosophical Transactions of the Royal Society. 337, 235-242 (1992). (updated data file provided by Peter Brown)	Stibel (see Methods for formula)	P. Brown, Recent human evolution in East Asia and Australasia. Philosophical Transactions of the Royal Society. 337, 235-242 (1992). (updated data file provided by Peter Brown)	0.973	0.261	-0.317	-4.052	-0.06	-0.36386	-1.01	26.76		-172.5
511	53	AM Homo	1496	1496	1439.78	0.039	2	2	Asia	Southern Chinese	P. Brown, Recent human evolution in East Asia and Australasia. Philosophical Transactions of the Royal Society. 337, 235-242 (1992). (updated data file provided by Peter Brown)	Stibel (see Methods for formula)	P. Brown, Recent human evolution in East Asia and Australasia. Philosophical Transactions of the Royal Society. 337, 235-242 (1992). (updated data file provided by Peter Brown)	0.973	0.261	-0.317	-4.052	-0.06	-0.36386	-1.01	26.76		-172.5
512	78	AM Homo	1340	1340	1293.06	0.039	2	2	Asia	Southern Chinese	P. Brown, Recent human evolution in East Asia and Australasia. Philosophical Transactions of the Royal Society. 337, 235-242 (1992). (updated data file provided by Peter Brown)	Stibel (see Methods for formula)	P. Brown, Recent human evolution in East Asia and Australasia. Philosophical Transactions of the Royal Society. 337, 235-242 (1992). (updated data file provided by Peter Brown)	0.973	0.261	-0.317	-4.052	-0.06	-0.36386	-1.01	26.76		-172.5
513	77	AM Homo	1612	1612	1548.64	0.039	2	2	Asia	Southern Chinese	P. Brown, Recent human evolution in East Asia and Australasia. Philosophical Transactions of the Royal Society. 337, 235-242 (1992). (updated data file provided by Peter Brown)	Stibel (see Methods for formula)	P. Brown, Recent human evolution in East Asia and Australasia. Philosophical Transactions of the Royal Society. 337, 235-242 (1992). (updated data file provided by Peter Brown)	0.973	0.261	-0.317	-4.052	-0.06	-0.36386	-1.01	26.76		-172.5
514	41	AM Homo	1532	1532	1473.59	0.039	2	2	Asia	Southern Chinese	P. Brown, Recent human evolution in East Asia and Australasia. Philosophical Transactions of the Royal Society. 337, 235-242 (1992). (updated data file provided by Peter Brown)	Stibel (see Methods for formula)	P. Brown, Recent human evolution in East Asia and Australasia. Philosophical Transactions of the Royal Society. 337, 235-242 (1992). (updated data file provided by Peter Brown)	0.973	0.261	-0.317	-4.052	-0.06	-0.36386	-1.01	26.76		-172.5
515	71	AM Homo	1452	1452	1398.44	0.039	2	2	Asia	Southern Chinese	P. Brown, Recent human evolution in East Asia and Australasia. Philosophical Transactions of the Royal Society. 337, 235-242 (1992). (updated data file provided by Peter Brown)	Stibel (see Methods for formula)	P. Brown, Recent human evolution in East Asia and Australasia. Philosophical Transactions of the Royal Society. 337, 235-242 (1992). (updated data file provided by Peter Brown)	0.973	0.261	-0.317	-4.052	-0.06	-0.36386	-1.01	26.76		-172.5
516	122.81	AM Homo	1528	1528	1469.83	0.039	2	2	Asia	Southern Chinese	P. Brown, Recent human evolution in East Asia and Australasia. Philosophical Transactions of the Royal Society. 337, 235-242 (1992). (updated data file provided by Peter Brown)	Stibel (see Methods for formula)	P. Brown, Recent human evolution in East Asia and Australasia. Philosophical Transactions of the Royal Society. 337, 235-242 (1992). (updated data file provided by Peter Brown)	0.973	0.261	-0.317	-4.052	-0.06	-0.36386	-1.01	26.76		-172.5
517	304.81	AM Homo	1474	1474	1419.11	0.039	2	2	Asia	Southern Chinese	P. Brown, Recent human evolution in East Asia and Australasia. Philosophical Transactions of the Royal Society. 337, 235-242 (1992). (updated data file provided by Peter Brown)	Stibel (see Methods for formula)	P. Brown, Recent human evolution in East Asia and Australasia. Philosophical Transactions of the Royal Society. 337, 235-242 (1992). (updated data file provided by Peter Brown)	0.973	0.261	-0.317	-4.052	-0.06	-0.36386	-1.01	26.76		-172.5
518	293.81	AM Homo	1188	1188	1149.7	0.039	2	2	Asia	Southern Chinese	P. Brown, Recent human evolution in East Asia and Australasia. Philosophical Transactions of the Royal Society. 337, 235-242 (1992). (updated data file provided by Peter Brown)	Stibel (see Methods for formula)	P. Brown, Recent human evolution in East Asia and Australasia. Philosophical Transactions of the Royal Society. 337, 235-242 (1992). (updated data file provided by Peter Brown)	0.973	0.261	-0.317	-4.052	-0.06	-0.36386	-1.01	26.76		-172.5
519	255.81	AM Homo	1608	1608	1544.89	0.039	2	2	Asia	Southern Chinese	P. Brown, Recent human evolution in East Asia and Australasia. Philosophical Transactions of the Royal Society. 337, 235-242 (1992). (updated data file provided by Peter Brown)	Stibel (see Methods for formula)	P. Brown, Recent human evolution in East Asia and Australasia. Philosophical Transactions of the Royal Society. 337, 235-242 (1992). (updated data file provided by Peter Brown)	0.973	0.261	-0.317	-4.052	-0.06	-0.36386	-1.01	26.76		-172.5
520	272.81	AM Homo	1508	1508	1451.05	0.039	2	2	Asia	Southern Chinese	P. Brown, Recent human evolution in East Asia and Australasia. Philosophical Transactions of the Royal Society. 337, 235-242 (1992). (updated data file provided by Peter Brown)	Stibel (see Methods for formula)	P. Brown, Recent human evolution in East Asia and Australasia. Philosophical Transactions of the Royal Society. 337, 235-242 (1992). (updated data file provided by Peter Brown)	0.973	0.261	-0.317	-4.052	-0.06	-0.36386	-1.01	26.76		-172.5
521	305.81	AM Homo	1516	1516	1458.57	0.039	2	2	Asia	Southern Chinese	P. Brown, Recent human evolution in East Asia and Australasia. Philosophical Transactions of the Royal Society. 337, 235-242 (1992). (updated data file provided by Peter Brown)	Stibel (see Methods for formula)	P. Brown, Recent human evolution in East Asia and Australasia. Philosophical Transactions of the Royal Society. 337, 235-242 (1992). (updated data file provided by Peter Brown)	0.973	0.261	-0.317	-4.052	-0.06	-0.36386	-1.01	26.76		-172.5
522	126.81	AM Homo	1695	1695	1626.42	0.039	2	2	Asia	Southern Chinese	P. Brown, Recent human evolution in East Asia and Australasia. Philosophical Transactions of the Royal Society. 337, 235-242 (1992). (updated data file provided by Peter Brown)	Stibel (see Methods for formula)	P. Brown, Recent human evolution in East Asia and Australasia. Philosophical Transactions of the Royal Society. 337, 235-242 (1992). (updated data file provided by Peter Brown)	0.973	0.261	-0.317	-4.052	-0.06	-0.36386	-1.01	26.76		-172.5
523	20.81	AM Homo	1361	1361	1312.83	0.039	2	2	Asia	Southern Chinese	P. Brown, Recent human evolution in East Asia and Australasia. Philosophical Transactions of the Royal Society. 337, 235-242 (1992). (updated data file provided by Peter Brown)	Stibel (see Methods for formula)	P. Brown, Recent human evolution in East Asia and Australasia. Philosophical Transactions of the Royal Society. 337, 235-242 (1992). (updated data file provided by Peter Brown)	0.973	0.261	-0.317	-4.052	-0.06	-0.36386	-1.01	26.76		-172.5
524	230.81	AM Homo	1675	1675	1607.69	0.039	2	2	Asia	Southern Chinese	P. Brown, Recent human evolution in East Asia and Australasia. Philosophical Transactions of the Royal Society. 337, 235-242 (1992). (updated data file provided by Peter Brown)	Stibel (see Methods for formula)	P. Brown, Recent human evolution in East Asia and Australasia. Philosophical Transactions of the Royal Society. 337, 235-242 (1992). (updated data file provided by Peter Brown)	0.973	0.261	-0.317	-4.052	-0.06	-0.36386	-1.01	26.76		-172.5
525	169	AM Homo	1429	1429	1376.81	0.039	1	2	Asia	Southern Chinese	P. Brown, Recent human evolution in East Asia and Australasia. Philosophical Transactions of the Royal Society. 337, 235-242 (1992). (updated data file provided by Peter Brown)	Stibel (see Methods for formula)	P. Brown, Recent human evolution in East Asia and Australasia. Philosophical Transactions of the Royal Society. 337, 235-242 (1992). (updated data file provided by Peter Brown)	0.973	0.261	-0.317	-4.052	-0.06	-0.36386	-1.01	26.76		-172.5
526	165	AM Homo	1503	1503	1446.36	0.039	1	2	Asia	Southern Chinese	P. Brown, Recent human evolution in East Asia and Australasia. Philosophical Transactions of the Royal Society. 337, 235-242 (1992). (updated data file provided by Peter Brown)	Stibel (see Methods for formula)	P. Brown, Recent human evolution in East Asia and Australasia. Philosophical Transactions of the Royal Society. 337, 235-242 (1992). (updated data file provided by Peter Brown)	0.973	0.261	-0.317	-4.052	-0.06	-0.36386	-1.01	26.76		-172.5
527	68	AM Homo	1467	1467	1412.53	0.039	1	2	Asia	Southern Chinese	P. Brown, Recent human evolution in East Asia and Australasia. Philosophical Transactions of the Royal Society. 337, 235-242 (1992). (updated data file provided by Peter Brown)	Stibel (see Methods for formula)	P. Brown, Recent human evolution in East Asia and Australasia. Philosophical Transactions of the Royal Society. 337, 235-242 (1992). (updated data file provided by Peter Brown)	0.973	0.261	-0.317	-4.052	-0.06	-0.36386	-1.01	26.76		-172.5
528	540	AM Homo	1408	1408	1357.06	0.039	1	2	Asia	Southern Chinese	P. Brown, Recent human evolution in East Asia and Australasia. Philosophical Transactions of the Royal Society. 337, 235-242 (1992). (updated data file provided by Peter Brown)	Stibel (see Methods for formula)	P. Brown, Recent human evolution in East Asia and Australasia. Philosophical Transactions of the Royal Society. 337, 235-242 (1992). (updated data file provided by Peter Brown)	0.973	0.261	-0.317	-4.052	-0.06	-0.36386	-1.01	26.76		-172.5
529	208	AM Homo	1305	1305	1260.08	0.039	1	2	Asia	Southern Chinese	P. Brown, Recent human evolution in East Asia and Australasia. Philosophical Transactions of the Royal Society. 337, 235-242 (1992). (updated data file provided by Peter Brown)	Stibel (see Methods for formula)	P. Brown, Recent human evolution in East Asia and Australasia. Philosophical Transactions of the Royal Society. 337, 235-242 (1992). (updated data file provided by Peter Brown)	0.973	0.261	-0.317	-4.052	-0.06	-0.36386	-1.01	26.76		-172.5
530	559	AM Homo	1207	1207	1167.64	0.039	1	2	Asia	Southern Chinese	P. Brown, Recent human evolution in East Asia and Australasia. Philosophical Transactions of the Royal Society. 337, 235-242 (1992). (updated data file provided by Peter Brown)	Stibel (see Methods for formula)	P. Brown, Recent human evolution in East Asia and Australasia. Philosophical Transactions of the Royal Society. 337, 235-242 (1992). (updated data file provided by Peter Brown)	0.973	0.261	-0.317	-4.052	-0.06	-0.36386	-1.01	26.76		-172.5
531	377	AM Homo	1230	1230	1189.35	0.039	1	2	Asia	Southern Chinese	P. Brown, Recent human evolution in East Asia and Australasia. Philosophical Transactions of the Royal Society. 337, 235-242 (1992). (updated data file provided by Peter Brown)	Stibel (see Methods for formula)	P. Brown, Recent human evolution in East Asia and Australasia. Philosophical Transactions of the Royal Society. 337, 235-242 (1992). (updated data file provided by Peter Brown)	0.973	0.261	-0.317	-4.052	-0.06	-0.36386	-1.01	26.76		-172.5
532	458	AM Homo	1305	1305	1260.08	0.039	1	2	Asia	Southern Chinese	P. Brown, Recent human evolution in East Asia and Australasia. Philosophical Transactions of the Royal Society. 337, 235-242 (1992). (updated data file provided by Peter Brown)	Stibel (see Methods for formula)	P. Brown, Recent human evolution in East Asia and Australasia. Philosophical Transactions of the Royal Society. 337, 235-242 (1992). (updated data file provided by Peter Brown)	0.973	0.261	-0.317	-4.052	-0.06	-0.36386	-1.01	26.76		-172.5
533	560	AM Homo	1236	1236	1195.02	0.039	1	2	Asia	Southern Chinese	P. Brown, Recent human evolution in East Asia and Australasia. Philosophical Transactions of the Royal Society. 337, 235-242 (1992). (updated data file provided by Peter Brown)	Stibel (see Methods for formula)	P. Brown, Recent human evolution in East Asia and Australasia. Philosophical Transactions of the Royal Society. 337, 235-242 (1992). (updated data file provided by Peter Brown)	0.973	0.261	-0.317	-4.052	-0.06	-0.36386	-1.01	26.76		-172.5
534	61	AM Homo	1430	1430	1377.75	0.039	1	2	Asia	Southern Chinese	P. Brown, Recent human evolution in East Asia and Australasia. Philosophical Transactions of the Royal Society. 337, 235-242 (1992). (updated data file provided by Peter Brown)	Stibel (see Methods for formula)	P. Brown, Recent human evolution in East Asia and Australasia. Philosophical Transactions of the Royal Society. 337, 235-242 (1992). (updated data file provided by Peter Brown)	0.973	0.261	-0.317	-4.052	-0.06	-0.36386	-1.01	26.76		-172.5
535	6	AM Homo	1291	1291	1246.89	0.039	1	2	Asia	Southern Chinese	P. Brown, Recent human evolution in East Asia and Australasia. Philosophical Transactions of the Royal Society. 337, 235-242 (1992). (updated data file provided by Peter Brown)	Stibel (see Methods for formula)	P. Brown, Recent human evolution in East Asia and Australasia. Philosophical Transactions of the Royal Society. 337, 235-242 (1992). (updated data file provided by Peter Brown)	0.973	0.261	-0.317	-4.052	-0.06	-0.36386	-1.01	26.76		-172.5
536	107	AM Homo	1294	1294	1249.72	0.039	1	2	Asia	Southern Chinese	P. Brown, Recent human evolution in East Asia and Australasia. Philosophical Transactions of the Royal Society. 337, 235-242 (1992). (updated data file provided by Peter Brown)	Stibel (see Methods for formula)	P. Brown, Recent human evolution in East Asia and Australasia. Philosophical Transactions of the Royal Society. 337, 235-242 (1992). (updated data file provided by Peter Brown)	0.973	0.261	-0.317	-4.052	-0.06	-0.36386	-1.01	26.76		-172.5
537	122	AM Homo	1230	1230	1189.35	0.039	1	2	Asia	Southern Chinese	P. Brown, Recent human evolution in East Asia and Australasia. Philosophical Transactions of the Royal Society. 337, 235-242 (1992). (updated data file provided by Peter Brown)	Stibel (see Methods for formula)	P. Brown, Recent human evolution in East Asia and Australasia. Philosophical Transactions of the Royal Society. 337, 235-242 (1992). (updated data file provided by Peter Brown)	0.973	0.261	-0.317	-4.052	-0.06	-0.36386	-1.01	26.76		-172.5
538	238	AM Homo	1279	1279	1235.57	0.039	1	2	Asia	Southern Chinese	P. Brown, Recent human evolution in East Asia and Australasia. Philosophical Transactions of the Royal Society. 337, 235-242 (1992). (updated data file provided by Peter Brown)	Stibel (see Methods for formula)	P. Brown, Recent human evolution in East Asia and Australasia. Philosophical Transactions of the Royal Society. 337, 235-242 (1992). (updated data file provided by Peter Brown)	0.973	0.261	-0.317	-4.052	-0.06	-0.36386	-1.01	26.76		-172.5
539	285	AM Homo	1335	1335	1288.35	0.039	1	2	Asia	Southern Chinese	P. Brown, Recent human evolution in East Asia and Australasia. Philosophical Transactions of the Royal Society. 337, 235-242 (1992). (updated data file provided by Peter Brown)	Stibel (see Methods for formula)	P. Brown, Recent human evolution in East Asia and Australasia. Philosophical Transactions of the Royal Society. 337, 235-242 (1992). (updated data file provided by Peter Brown)	0.973	0.261	-0.317	-4.052	-0.06	-0.36386	-1.01	26.76		-172.5
540	308	AM Homo	1299	1299	1254.43	0.039	1	2	Asia	Southern Chinese	P. Brown, Recent human evolution in East Asia and Australasia. Philosophical Transactions of the Royal Society. 337, 235-242 (1992). (updated data file provided by Peter Brown)	Stibel (see Methods for formula)	P. Brown, Recent human evolution in East Asia and Australasia. Philosophical Transactions of the Royal Society. 337, 235-242 (1992). (updated data file provided by Peter Brown)	0.973	0.261	-0.317	-4.052	-0.06	-0.36386	-1.01	26.76		-172.5
541	324	AM Homo	1274	1274	1230.86	0.039	1	2	Asia	Southern Chinese	P. Brown, Recent human evolution in East Asia and Australasia. Philosophical Transactions of the Royal Society. 337, 235-242 (1992). (updated data file provided by Peter Brown)	Stibel (see Methods for formula)	P. Brown, Recent human evolution in East Asia and Australasia. Philosophical Transactions of the Royal Society. 337, 235-242 (1992). (updated data file provided by Peter Brown)	0.973	0.261	-0.317	-4.052	-0.06	-0.36386	-1.01	26.76		-172.5
542	188	AM Homo	1410	1410	1358.94	0.087	2	2	Asia	North Chinese	P. Brown, Recent human evolution in East Asia and Australasia. Philosophical Transactions of the Royal Society. 337, 235-242 (1992). (updated data file provided by Peter Brown)	Stibel (see Methods for formula)	P. Brown, Recent human evolution in East Asia and Australasia. Philosophical Transactions of the Royal Society. 337, 235-242 (1992). (updated data file provided by Peter Brown)	0.973	-0.15	-0.054	-4.693	-0.06	-0.36386	-1.01	26.76		-172.5
543	195	AM Homo	1340	1340	1293.06	0.087	2	2	Asia	North Chinese	P. Brown, Recent human evolution in East Asia and Australasia. Philosophical Transactions of the Royal Society. 337, 235-242 (1992). (updated data file provided by Peter Brown)	Stibel (see Methods for formula)	P. Brown, Recent human evolution in East Asia and Australasia. Philosophical Transactions of the Royal Society. 337, 235-242 (1992). (updated data file provided by Peter Brown)	0.973	-0.15	-0.054	-4.693	-0.06	-0.36386	-1.01	26.76		-172.5
544	133	AM Homo	1448	1448	1394.68	0.087	2	2	Asia	North Chinese	P. Brown, Recent human evolution in East Asia and Australasia. Philosophical Transactions of the Royal Society. 337, 235-242 (1992). (updated data file provided by Peter Brown)	Stibel (see Methods for formula)	P. Brown, Recent human evolution in East Asia and Australasia. Philosophical Transactions of the Royal Society. 337, 235-242 (1992). (updated data file provided by Peter Brown)	0.973	-0.15	-0.054	-4.693	-0.06	-0.36386	-1.01	26.76		-172.5
545	229	AM Homo	1326	1326	1279.87	0.087	2	2	Asia	North Chinese	P. Brown, Recent human evolution in East Asia and Australasia. Philosophical Transactions of the Royal Society. 337, 235-242 (1992). (updated data file provided by Peter Brown)	Stibel (see Methods for formula)	P. Brown, Recent human evolution in East Asia and Australasia. Philosophical Transactions of the Royal Society. 337, 235-242 (1992). (updated data file provided by Peter Brown)	0.973	-0.15	-0.054	-4.693	-0.06	-0.36386	-1.01	26.76		-172.5
546	235	AM Homo	1453	1453	1399.38	0.087	2	2	Asia	North Chinese	P. Brown, Recent human evolution in East Asia and Australasia. Philosophical Transactions of the Royal Society. 337, 235-242 (1992). (updated data file provided by Peter Brown)	Stibel (see Methods for formula)	P. Brown, Recent human evolution in East Asia and Australasia. Philosophical Transactions of the Royal Society. 337, 235-242 (1992). (updated data file provided by Peter Brown)	0.973	-0.15	-0.054	-4.693	-0.06	-0.36386	-1.01	26.76		-172.5
547	252	AM Homo	1262	1262	1219.54	0.087	2	2	Asia	North Chinese	P. Brown, Recent human evolution in East Asia and Australasia. Philosophical Transactions of the Royal Society. 337, 235-242 (1992). (updated data file provided by Peter Brown)	Stibel (see Methods for formula)	P. Brown, Recent human evolution in East Asia and Australasia. Philosophical Transactions of the Royal Society. 337, 235-242 (1992). (updated data file provided by Peter Brown)	0.973	-0.15	-0.054	-4.693	-0.06	-0.36386	-1.01	26.76		-172.5
548	201	AM Homo	1440	1440	1387.16	0.087	2	2	Asia	North Chinese	P. Brown, Recent human evolution in East Asia and Australasia. Philosophical Transactions of the Royal Society. 337, 235-242 (1992). (updated data file provided by Peter Brown)	Stibel (see Methods for formula)	P. Brown, Recent human evolution in East Asia and Australasia. Philosophical Transactions of the Royal Society. 337, 235-242 (1992). (updated data file provided by Peter Brown)	0.973	-0.15	-0.054	-4.693	-0.06	-0.36386	-1.01	26.76		-172.5
549	236	AM Homo	1490	1490	1434.15	0.087	2	2	Asia	North Chinese	P. Brown, Recent human evolution in East Asia and Australasia. Philosophical Transactions of the Royal Society. 337, 235-242 (1992). (updated data file provided by Peter Brown)	Stibel (see Methods for formula)	P. Brown, Recent human evolution in East Asia and Australasia. Philosophical Transactions of the Royal Society. 337, 235-242 (1992). (updated data file provided by Peter Brown)	0.973	-0.15	-0.054	-4.693	-0.06	-0.36386	-1.01	26.76		-172.5
550	108	AM Homo	1460	1460	1405.96	0.087	2	2	Asia	North Chinese	P. Brown, Recent human evolution in East Asia and Australasia. Philosophical Transactions of the Royal Society. 337, 235-242 (1992). (updated data file provided by Peter Brown)	Stibel (see Methods for formula)	P. Brown, Recent human evolution in East Asia and Australasia. Philosophical Transactions of the Royal Society. 337, 235-242 (1992). (updated data file provided by Peter Brown)	0.973	-0.15	-0.054	-4.693	-0.06	-0.36386	-1.01	26.76		-172.5
551	159	AM Homo	1280	1280	1236.52	0.087	2	2	Asia	North Chinese	P. Brown, Recent human evolution in East Asia and Australasia. Philosophical Transactions of the Royal Society. 337, 235-242 (1992). (updated data file provided by Peter Brown)	Stibel (see Methods for formula)	P. Brown, Recent human evolution in East Asia and Australasia. Philosophical Transactions of the Royal Society. 337, 235-242 (1992). (updated data file provided by Peter Brown)	0.973	-0.15	-0.054	-4.693	-0.06	-0.36386	-1.01	26.76		-172.5
552	169	AM Homo	1440	1440	1387.16	0.087	2	2	Asia	North Chinese	P. Brown, Recent human evolution in East Asia and Australasia. Philosophical Transactions of the Royal Society. 337, 235-242 (1992). (updated data file provided by Peter Brown)	Stibel (see Methods for formula)	P. Brown, Recent human evolution in East Asia and Australasia. Philosophical Transactions of the Royal Society. 337, 235-242 (1992). (updated data file provided by Peter Brown)	0.973	-0.15	-0.054	-4.693	-0.06	-0.36386	-1.01	26.76		-172.5
553	186	AM Homo	1320	1320	1274.22	0.087	2	2	Asia	North Chinese	P. Brown, Recent human evolution in East Asia and Australasia. Philosophical Transactions of the Royal Society. 337, 235-242 (1992). (updated data file provided by Peter Brown)	Stibel (see Methods for formula)	P. Brown, Recent human evolution in East Asia and Australasia. Philosophical Transactions of the Royal Society. 337, 235-242 (1992). (updated data file provided by Peter Brown)	0.973	-0.15	-0.054	-4.693	-0.06	-0.36386	-1.01	26.76		-172.5
554	175	AM Homo	1280	1280	1236.52	0.087	2	2	Asia	North Chinese	P. Brown, Recent human evolution in East Asia and Australasia. Philosophical Transactions of the Royal Society. 337, 235-242 (1992). (updated data file provided by Peter Brown)	Stibel (see Methods for formula)	P. Brown, Recent human evolution in East Asia and Australasia. Philosophical Transactions of the Royal Society. 337, 235-242 (1992). (updated data file provided by Peter Brown)	0.973	-0.15	-0.054	-4.693	-0.06	-0.36386	-1.01	26.76		-172.5
555	208	AM Homo	1420	1420	1368.35	0.087	2	2	Asia	North Chinese	P. Brown, Recent human evolution in East Asia and Australasia. Philosophical Transactions of the Royal Society. 337, 235-242 (1992). (updated data file provided by Peter Brown)	Stibel (see Methods for formula)	P. Brown, Recent human evolution in East Asia and Australasia. Philosophical Transactions of the Royal Society. 337, 235-242 (1992). (updated data file provided by Peter Brown)	0.973	-0.15	-0.054	-4.693	-0.06	-0.36386	-1.01	26.76		-172.5
556	243	AM Homo	1440	1440	1387.16	0.087	2	2	Asia	North Chinese	P. Brown, Recent human evolution in East Asia and Australasia. Philosophical Transactions of the Royal Society. 337, 235-242 (1992). (updated data file provided by Peter Brown)	Stibel (see Methods for formula)	P. Brown, Recent human evolution in East Asia and Australasia. Philosophical Transactions of the Royal Society. 337, 235-242 (1992). (updated data file provided by Peter Brown)	0.973	-0.15	-0.054	-4.693	-0.06	-0.36386	-1.01	26.76		-172.5
557	244	AM Homo	1359	1359	1310.95	0.087	2	2	Asia	North Chinese	P. Brown, Recent human evolution in East Asia and Australasia. Philosophical Transactions of the Royal Society. 337, 235-242 (1992). (updated data file provided by Peter Brown)	Stibel (see Methods for formula)	P. Brown, Recent human evolution in East Asia and Australasia. Philosophical Transactions of the Royal Society. 337, 235-242 (1992). (updated data file provided by Peter Brown)	0.973	-0.15	-0.054	-4.693	-0.06	-0.36386	-1.01	26.76		-172.5
558	171	AM Homo	1450	1450	1396.56	0.087	2	2	Asia	North Chinese	P. Brown, Recent human evolution in East Asia and Australasia. Philosophical Transactions of the Royal Society. 337, 235-242 (1992). (updated data file provided by Peter Brown)	Stibel (see Methods for formula)	P. Brown, Recent human evolution in East Asia and Australasia. Philosophical Transactions of the Royal Society. 337, 235-242 (1992). (updated data file provided by Peter Brown)	0.973	-0.15	-0.054	-4.693	-0.06	-0.36386	-1.01	26.76		-172.5
559	179	AM Homo	1330	1330	1283.64	0.087	2	2	Asia	North Chinese	P. Brown, Recent human evolution in East Asia and Australasia. Philosophical Transactions of the Royal Society. 337, 235-242 (1992). (updated data file provided by Peter Brown)	Stibel (see Methods for formula)	P. Brown, Recent human evolution in East Asia and Australasia. Philosophical Transactions of the Royal Society. 337, 235-242 (1992). (updated data file provided by Peter Brown)	0.973	-0.15	-0.054	-4.693	-0.06	-0.36386	-1.01	26.76		-172.5
560	162	AM Homo	1300	1300	1255.37	0.087	2	2	Asia	North Chinese	P. Brown, Recent human evolution in East Asia and Australasia. Philosophical Transactions of the Royal Society. 337, 235-242 (1992). (updated data file provided by Peter Brown)	Stibel (see Methods for formula)	P. Brown, Recent human evolution in East Asia and Australasia. Philosophical Transactions of the Royal Society. 337, 235-242 (1992). (updated data file provided by Peter Brown)	0.973	-0.15	-0.054	-4.693	-0.06	-0.36386	-1.01	26.76		-172.5
561	100	AM Homo	1140	1140	1104.34	0.087	2	2	Asia	North Chinese	P. Brown, Recent human evolution in East Asia and Australasia. Philosophical Transactions of the Royal Society. 337, 235-242 (1992). (updated data file provided by Peter Brown)	Stibel (see Methods for formula)	P. Brown, Recent human evolution in East Asia and Australasia. Philosophical Transactions of the Royal Society. 337, 235-242 (1992). (updated data file provided by Peter Brown)	0.973	-0.15	-0.054	-4.693	-0.06	-0.36386	-1.01	26.76		-172.5
562	112	AM Homo	1240	1240	1198.79	0.087	2	2	Asia	North Chinese	P. Brown, Recent human evolution in East Asia and Australasia. Philosophical Transactions of the Royal Society. 337, 235-242 (1992). (updated data file provided by Peter Brown)	Stibel (see Methods for formula)	P. Brown, Recent human evolution in East Asia and Australasia. Philosophical Transactions of the Royal Society. 337, 235-242 (1992). (updated data file provided by Peter Brown)	0.973	-0.15	-0.054	-4.693	-0.06	-0.36386	-1.01	26.76		-172.5
563	110	AM Homo	1300	1300	1255.37	0.087	2	2	Asia	North Chinese	P. Brown, Recent human evolution in East Asia and Australasia. Philosophical Transactions of the Royal Society. 337, 235-242 (1992). (updated data file provided by Peter Brown)	Stibel (see Methods for formula)	P. Brown, Recent human evolution in East Asia and Australasia. Philosophical Transactions of the Royal Society. 337, 235-242 (1992). (updated data file provided by Peter Brown)	0.973	-0.15	-0.054	-4.693	-0.06	-0.36386	-1.01	26.76		-172.5
564	94	AM Homo	1360	1360	1311.89	0.087	2	2	Asia	North Chinese	P. Brown, Recent human evolution in East Asia and Australasia. Philosophical Transactions of the Royal Society. 337, 235-242 (1992). (updated data file provided by Peter Brown)	Stibel (see Methods for formula)	P. Brown, Recent human evolution in East Asia and Australasia. Philosophical Transactions of the Royal Society. 337, 235-242 (1992). (updated data file provided by Peter Brown)	0.973	-0.15	-0.054	-4.693	-0.06	-0.36386	-1.01	26.76		-172.5
565	91	AM Homo	1390	1390	1340.13	0.087	2	2	Asia	North Chinese	P. Brown, Recent human evolution in East Asia and Australasia. Philosophical Transactions of the Royal Society. 337, 235-242 (1992). (updated data file provided by Peter Brown)	Stibel (see Methods for formula)	P. Brown, Recent human evolution in East Asia and Australasia. Philosophical Transactions of the Royal Society. 337, 235-242 (1992). (updated data file provided by Peter Brown)	0.973	-0.15	-0.054	-4.693	-0.06	-0.36386	-1.01	26.76		-172.5
566	89	AM Homo	1540	1540	1481.1	0.087	2	2	Asia	North Chinese	P. Brown, Recent human evolution in East Asia and Australasia. Philosophical Transactions of the Royal Society. 337, 235-242 (1992). (updated data file provided by Peter Brown)	Stibel (see Methods for formula)	P. Brown, Recent human evolution in East Asia and Australasia. Philosophical Transactions of the Royal Society. 337, 235-242 (1992). (updated data file provided by Peter Brown)	0.973	-0.15	-0.054	-4.693	-0.06	-0.36386	-1.01	26.76		-172.5
567	88	AM Homo	1460	1460	1405.96	0.087	2	2	Asia	North Chinese	P. Brown, Recent human evolution in East Asia and Australasia. Philosophical Transactions of the Royal Society. 337, 235-242 (1992). (updated data file provided by Peter Brown)	Stibel (see Methods for formula)	P. Brown, Recent human evolution in East Asia and Australasia. Philosophical Transactions of the Royal Society. 337, 235-242 (1992). (updated data file provided by Peter Brown)	0.973	-0.15	-0.054	-4.693	-0.06	-0.36386	-1.01	26.76		-172.5
568	95	AM Homo	1200	1200	1161.03	0.087	2	2	Asia	North Chinese	P. Brown, Recent human evolution in East Asia and Australasia. Philosophical Transactions of the Royal Society. 337, 235-242 (1992). (updated data file provided by Peter Brown)	Stibel (see Methods for formula)	P. Brown, Recent human evolution in East Asia and Australasia. Philosophical Transactions of the Royal Society. 337, 235-242 (1992). (updated data file provided by Peter Brown)	0.973	-0.15	-0.054	-4.693	-0.06	-0.36386	-1.01	26.76		-172.5
569	165	AM Homo	1420	1420	1368.35	0.087	2	2	Asia	North Chinese	P. Brown, Recent human evolution in East Asia and Australasia. Philosophical Transactions of the Royal Society. 337, 235-242 (1992). (updated data file provided by Peter Brown)	Stibel (see Methods for formula)	P. Brown, Recent human evolution in East Asia and Australasia. Philosophical Transactions of the Royal Society. 337, 235-242 (1992). (updated data file provided by Peter Brown)	0.973	-0.15	-0.054	-4.693	-0.06	-0.36386	-1.01	26.76		-172.5
570	199	AM Homo	1372	1372	1323.19	0.087	2	2	Asia	North Chinese	P. Brown, Recent human evolution in East Asia and Australasia. Philosophical Transactions of the Royal Society. 337, 235-242 (1992). (updated data file provided by Peter Brown)	Stibel (see Methods for formula)	P. Brown, Recent human evolution in East Asia and Australasia. Philosophical Transactions of the Royal Society. 337, 235-242 (1992). (updated data file provided by Peter Brown)	0.973	-0.15	-0.054	-4.693	-0.06	-0.36386	-1.01	26.76		-172.5
571	216	AM Homo	1452	1452	1398.44	0.087	2	2	Asia	North Chinese	P. Brown, Recent human evolution in East Asia and Australasia. Philosophical Transactions of the Royal Society. 337, 235-242 (1992). (updated data file provided by Peter Brown)	Stibel (see Methods for formula)	P. Brown, Recent human evolution in East Asia and Australasia. Philosophical Transactions of the Royal Society. 337, 235-242 (1992). (updated data file provided by Peter Brown)	0.973	-0.15	-0.054	-4.693	-0.06	-0.36386	-1.01	26.76		-172.5
572	203	AM Homo	1360	1360	1311.89	0.087	2	2	Asia	North Chinese	P. Brown, Recent human evolution in East Asia and Australasia. Philosophical Transactions of the Royal Society. 337, 235-242 (1992). (updated data file provided by Peter Brown)	Stibel (see Methods for formula)	P. Brown, Recent human evolution in East Asia and Australasia. Philosophical Transactions of the Royal Society. 337, 235-242 (1992). (updated data file provided by Peter Brown)	0.973	-0.15	-0.054	-4.693	-0.06	-0.36386	-1.01	26.76		-172.5
573	191	AM Homo	1340	1340	1293.06	0.087	2	2	Asia	North Chinese	P. Brown, Recent human evolution in East Asia and Australasia. Philosophical Transactions of the Royal Society. 337, 235-242 (1992). (updated data file provided by Peter Brown)	Stibel (see Methods for formula)	P. Brown, Recent human evolution in East Asia and Australasia. Philosophical Transactions of the Royal Society. 337, 235-242 (1992). (updated data file provided by Peter Brown)	0.973	-0.15	-0.054	-4.693	-0.06	-0.36386	-1.01	26.76		-172.5
574	189	AM Homo	1390	1390	1340.13	0.087	2	2	Asia	North Chinese	P. Brown, Recent human evolution in East Asia and Australasia. Philosophical Transactions of the Royal Society. 337, 235-242 (1992). (updated data file provided by Peter Brown)	Stibel (see Methods for formula)	P. Brown, Recent human evolution in East Asia and Australasia. Philosophical Transactions of the Royal Society. 337, 235-242 (1992). (updated data file provided by Peter Brown)	0.973	-0.15	-0.054	-4.693	-0.06	-0.36386	-1.01	26.76		-172.5
575	197	AM Homo	1280	1280	1236.52	0.087	2	2	Asia	North Chinese	P. Brown, Recent human evolution in East Asia and Australasia. Philosophical Transactions of the Royal Society. 337, 235-242 (1992). (updated data file provided by Peter Brown)	Stibel (see Methods for formula)	P. Brown, Recent human evolution in East Asia and Australasia. Philosophical Transactions of the Royal Society. 337, 235-242 (1992). (updated data file provided by Peter Brown)	0.973	-0.15	-0.054	-4.693	-0.06	-0.36386	-1.01	26.76		-172.5
576	196	AM Homo	1290	1290	1245.95	0.087	2	2	Asia	North Chinese	P. Brown, Recent human evolution in East Asia and Australasia. Philosophical Transactions of the Royal Society. 337, 235-242 (1992). (updated data file provided by Peter Brown)	Stibel (see Methods for formula)	P. Brown, Recent human evolution in East Asia and Australasia. Philosophical Transactions of the Royal Society. 337, 235-242 (1992). (updated data file provided by Peter Brown)	0.973	-0.15	-0.054	-4.693	-0.06	-0.36386	-1.01	26.76		-172.5
577	183	AM Homo	1600	1600	1537.39	0.087	2	2	Asia	North Chinese	P. Brown, Recent human evolution in East Asia and Australasia. Philosophical Transactions of the Royal Society. 337, 235-242 (1992). (updated data file provided by Peter Brown)	Stibel (see Methods for formula)	P. Brown, Recent human evolution in East Asia and Australasia. Philosophical Transactions of the Royal Society. 337, 235-242 (1992). (updated data file provided by Peter Brown)	0.973	-0.15	-0.054	-4.693	-0.06	-0.36386	-1.01	26.76		-172.5
578	177	AM Homo	1299	1299	1254.43	0.087	2	2	Asia	North Chinese	P. Brown, Recent human evolution in East Asia and Australasia. Philosophical Transactions of the Royal Society. 337, 235-242 (1992). (updated data file provided by Peter Brown)	Stibel (see Methods for formula)	P. Brown, Recent human evolution in East Asia and Australasia. Philosophical Transactions of the Royal Society. 337, 235-242 (1992). (updated data file provided by Peter Brown)	0.973	-0.15	-0.054	-4.693	-0.06	-0.36386	-1.01	26.76		-172.5
579	63	AM Homo	1380	1380	1330.72	0.25	2	2	Europe	United Kingdom	P. Brown, Recent human evolution in East Asia and Australasia. Philosophical Transactions of the Royal Society. 337, 235-242 (1992). (updated data file provided by Peter Brown)	Stibel (see Methods for formula)	P. Brown, Recent human evolution in East Asia and Australasia. Philosophical Transactions of the Royal Society. 337, 235-242 (1992). (updated data file provided by Peter Brown)	-0.051	0.062	-0.423	-5.321	-0.06	-0.36386	-1.01	26.76		331
580	162	AM Homo	1410	1410	1358.94	0.25	2	2	Europe	United Kingdom	P. Brown, Recent human evolution in East Asia and Australasia. Philosophical Transactions of the Royal Society. 337, 235-242 (1992). (updated data file provided by Peter Brown)	Stibel (see Methods for formula)	P. Brown, Recent human evolution in East Asia and Australasia. Philosophical Transactions of the Royal Society. 337, 235-242 (1992). (updated data file provided by Peter Brown)	-0.051	0.062	-0.423	-5.321	-0.06	-0.36386	-1.01	26.76		331
581	187	AM Homo	1290	1290	1245.95	0.25	2	2	Europe	United Kingdom	P. Brown, Recent human evolution in East Asia and Australasia. Philosophical Transactions of the Royal Society. 337, 235-242 (1992). (updated data file provided by Peter Brown)	Stibel (see Methods for formula)	P. Brown, Recent human evolution in East Asia and Australasia. Philosophical Transactions of the Royal Society. 337, 235-242 (1992). (updated data file provided by Peter Brown)	-0.051	0.062	-0.423	-5.321	-0.06	-0.36386	-1.01	26.76		331
582	254	AM Homo	1460	1460	1405.96	0.25	2	2	Europe	United Kingdom	P. Brown, Recent human evolution in East Asia and Australasia. Philosophical Transactions of the Royal Society. 337, 235-242 (1992). (updated data file provided by Peter Brown)	Stibel (see Methods for formula)	P. Brown, Recent human evolution in East Asia and Australasia. Philosophical Transactions of the Royal Society. 337, 235-242 (1992). (updated data file provided by Peter Brown)	-0.051	0.062	-0.423	-5.321	-0.06	-0.36386	-1.01	26.76		331
583	255	AM Homo	1350	1350	1302.47	0.25	2	2	Europe	United Kingdom	P. Brown, Recent human evolution in East Asia and Australasia. Philosophical Transactions of the Royal Society. 337, 235-242 (1992). (updated data file provided by Peter Brown)	Stibel (see Methods for formula)	P. Brown, Recent human evolution in East Asia and Australasia. Philosophical Transactions of the Royal Society. 337, 235-242 (1992). (updated data file provided by Peter Brown)	-0.051	0.062	-0.423	-5.321	-0.06	-0.36386	-1.01	26.76		331
584	495	AM Homo	1340	1340	1293.06	0.25	2	2	Europe	United Kingdom	P. Brown, Recent human evolution in East Asia and Australasia. Philosophical Transactions of the Royal Society. 337, 235-242 (1992). (updated data file provided by Peter Brown)	Stibel (see Methods for formula)	P. Brown, Recent human evolution in East Asia and Australasia. Philosophical Transactions of the Royal Society. 337, 235-242 (1992). (updated data file provided by Peter Brown)	-0.051	0.062	-0.423	-5.321	-0.06	-0.36386	-1.01	26.76		331
585	545	AM Homo	1420	1420	1368.35	0.25	2	2	Europe	United Kingdom	P. Brown, Recent human evolution in East Asia and Australasia. Philosophical Transactions of the Royal Society. 337, 235-242 (1992). (updated data file provided by Peter Brown)	Stibel (see Methods for formula)	P. Brown, Recent human evolution in East Asia and Australasia. Philosophical Transactions of the Royal Society. 337, 235-242 (1992). (updated data file provided by Peter Brown)	-0.051	0.062	-0.423	-5.321	-0.06	-0.36386	-1.01	26.76		331
586	173	AM Homo	1360	1360	1311.89	0.25	2	2	Europe	United Kingdom	P. Brown, Recent human evolution in East Asia and Australasia. Philosophical Transactions of the Royal Society. 337, 235-242 (1992). (updated data file provided by Peter Brown)	Stibel (see Methods for formula)	P. Brown, Recent human evolution in East Asia and Australasia. Philosophical Transactions of the Royal Society. 337, 235-242 (1992). (updated data file provided by Peter Brown)	-0.051	0.062	-0.423	-5.321	-0.06	-0.36386	-1.01	26.76		331
587	182	AM Homo	1260	1260	1217.66	0.25	2	2	Europe	United Kingdom	P. Brown, Recent human evolution in East Asia and Australasia. Philosophical Transactions of the Royal Society. 337, 235-242 (1992). (updated data file provided by Peter Brown)	Stibel (see Methods for formula)	P. Brown, Recent human evolution in East Asia and Australasia. Philosophical Transactions of the Royal Society. 337, 235-242 (1992). (updated data file provided by Peter Brown)	-0.051	0.062	-0.423	-5.321	-0.06	-0.36386	-1.01	26.76		331
588	728	AM Homo	1320	1320	1274.22	0.25	2	2	Europe	United Kingdom	P. Brown, Recent human evolution in East Asia and Australasia. Philosophical Transactions of the Royal Society. 337, 235-242 (1992). (updated data file provided by Peter Brown)	Stibel (see Methods for formula)	P. Brown, Recent human evolution in East Asia and Australasia. Philosophical Transactions of the Royal Society. 337, 235-242 (1992). (updated data file provided by Peter Brown)	-0.051	0.062	-0.423	-5.321	-0.06	-0.36386	-1.01	26.76		331
589	622	AM Homo	1360	1360	1311.89	0.25	2	2	Europe	United Kingdom	P. Brown, Recent human evolution in East Asia and Australasia. Philosophical Transactions of the Royal Society. 337, 235-242 (1992). (updated data file provided by Peter Brown)	Stibel (see Methods for formula)	P. Brown, Recent human evolution in East Asia and Australasia. Philosophical Transactions of the Royal Society. 337, 235-242 (1992). (updated data file provided by Peter Brown)	-0.051	0.062	-0.423	-5.321	-0.06	-0.36386	-1.01	26.76		331
590	712	AM Homo	1475	1475	1420.05	0.25	2	2	Europe	United Kingdom	P. Brown, Recent human evolution in East Asia and Australasia. Philosophical Transactions of the Royal Society. 337, 235-242 (1992). (updated data file provided by Peter Brown)	Stibel (see Methods for formula)	P. Brown, Recent human evolution in East Asia and Australasia. Philosophical Transactions of the Royal Society. 337, 235-242 (1992). (updated data file provided by Peter Brown)	-0.051	0.062	-0.423	-5.321	-0.06	-0.36386	-1.01	26.76		331
591	811	AM Homo	1565	1565	1504.56	0.25	2	2	Europe	United Kingdom	P. Brown, Recent human evolution in East Asia and Australasia. Philosophical Transactions of the Royal Society. 337, 235-242 (1992). (updated data file provided by Peter Brown)	Stibel (see Methods for formula)	P. Brown, Recent human evolution in East Asia and Australasia. Philosophical Transactions of the Royal Society. 337, 235-242 (1992). (updated data file provided by Peter Brown)	-0.051	0.062	-0.423	-5.321	-0.06	-0.36386	-1.01	26.76		331
592	98	AM Homo	1250	1250	1208.22	0.25	1	2	Europe	United Kingdom	P. Brown, Recent human evolution in East Asia and Australasia. Philosophical Transactions of the Royal Society. 337, 235-242 (1992). (updated data file provided by Peter Brown)	Stibel (see Methods for formula)	P. Brown, Recent human evolution in East Asia and Australasia. Philosophical Transactions of the Royal Society. 337, 235-242 (1992). (updated data file provided by Peter Brown)	-0.051	0.062	-0.423	-5.321	-0.06	-0.36386	-1.01	26.76		331
593	99	AM Homo	1180	1180	1142.14	0.25	1	2	Europe	United Kingdom	P. Brown, Recent human evolution in East Asia and Australasia. Philosophical Transactions of the Royal Society. 337, 235-242 (1992). (updated data file provided by Peter Brown)	Stibel (see Methods for formula)	P. Brown, Recent human evolution in East Asia and Australasia. Philosophical Transactions of the Royal Society. 337, 235-242 (1992). (updated data file provided by Peter Brown)	-0.051	0.062	-0.423	-5.321	-0.06	-0.36386	-1.01	26.76		331
594	70	AM Homo	1440	1440	1387.16	0.25	1	2	Europe	United Kingdom	P. Brown, Recent human evolution in East Asia and Australasia. Philosophical Transactions of the Royal Society. 337, 235-242 (1992). (updated data file provided by Peter Brown)	Stibel (see Methods for formula)	P. Brown, Recent human evolution in East Asia and Australasia. Philosophical Transactions of the Royal Society. 337, 235-242 (1992). (updated data file provided by Peter Brown)	-0.051	0.062	-0.423	-5.321	-0.06	-0.36386	-1.01	26.76		331
595	134	AM Homo	1310	1310	1264.8	0.25	1	2	Europe	United Kingdom	P. Brown, Recent human evolution in East Asia and Australasia. Philosophical Transactions of the Royal Society. 337, 235-242 (1992). (updated data file provided by Peter Brown)	Stibel (see Methods for formula)	P. Brown, Recent human evolution in East Asia and Australasia. Philosophical Transactions of the Royal Society. 337, 235-242 (1992). (updated data file provided by Peter Brown)	-0.051	0.062	-0.423	-5.321	-0.06	-0.36386	-1.01	26.76		331
596	142	AM Homo	1180	1180	1142.14	0.25	1	2	Europe	United Kingdom	P. Brown, Recent human evolution in East Asia and Australasia. Philosophical Transactions of the Royal Society. 337, 235-242 (1992). (updated data file provided by Peter Brown)	Stibel (see Methods for formula)	P. Brown, Recent human evolution in East Asia and Australasia. Philosophical Transactions of the Royal Society. 337, 235-242 (1992). (updated data file provided by Peter Brown)	-0.051	0.062	-0.423	-5.321	-0.06	-0.36386	-1.01	26.76		331
597	152	AM Homo	1360	1360	1311.89	0.25	1	2	Europe	United Kingdom	P. Brown, Recent human evolution in East Asia and Australasia. Philosophical Transactions of the Royal Society. 337, 235-242 (1992). (updated data file provided by Peter Brown)	Stibel (see Methods for formula)	P. Brown, Recent human evolution in East Asia and Australasia. Philosophical Transactions of the Royal Society. 337, 235-242 (1992). (updated data file provided by Peter Brown)	-0.051	0.062	-0.423	-5.321	-0.06	-0.36386	-1.01	26.76		331
598	189	AM Homo	1340	1340	1293.06	0.25	1	2	Europe	United Kingdom	P. Brown, Recent human evolution in East Asia and Australasia. Philosophical Transactions of the Royal Society. 337, 235-242 (1992). (updated data file provided by Peter Brown)	Stibel (see Methods for formula)	P. Brown, Recent human evolution in East Asia and Australasia. Philosophical Transactions of the Royal Society. 337, 235-242 (1992). (updated data file provided by Peter Brown)	-0.051	0.062	-0.423	-5.321	-0.06	-0.36386	-1.01	26.76		331
599	192	AM Homo	1225	1225	1184.63	0.25	1	2	Europe	United Kingdom	P. Brown, Recent human evolution in East Asia and Australasia. Philosophical Transactions of the Royal Society. 337, 235-242 (1992). (updated data file provided by Peter Brown)	Stibel (see Methods for formula)	P. Brown, Recent human evolution in East Asia and Australasia. Philosophical Transactions of the Royal Society. 337, 235-242 (1992). (updated data file provided by Peter Brown)	-0.051	0.062	-0.423	-5.321	-0.06	-0.36386	-1.01	26.76		331
600	296	AM Homo	1310	1310	1264.8	0.25	1	2	Europe	United Kingdom	P. Brown, Recent human evolution in East Asia and Australasia. Philosophical Transactions of the Royal Society. 337, 235-242 (1992). (updated data file provided by Peter Brown)	Stibel (see Methods for formula)	P. Brown, Recent human evolution in East Asia and Australasia. Philosophical Transactions of the Royal Society. 337, 235-242 (1992). (updated data file provided by Peter Brown)	-0.051	0.062	-0.423	-5.321	-0.06	-0.36386	-1.01	26.76		331
601	301	AM Homo	1160	1160	1123.24	0.25	1	2	Europe	United Kingdom	P. Brown, Recent human evolution in East Asia and Australasia. Philosophical Transactions of the Royal Society. 337, 235-242 (1992). (updated data file provided by Peter Brown)	Stibel (see Methods for formula)	P. Brown, Recent human evolution in East Asia and Australasia. Philosophical Transactions of the Royal Society. 337, 235-242 (1992). (updated data file provided by Peter Brown)	-0.051	0.062	-0.423	-5.321	-0.06	-0.36386	-1.01	26.76		331
602	399	AM Homo	1195	1195	1156.31	0.25	1	2	Europe	United Kingdom	P. Brown, Recent human evolution in East Asia and Australasia. Philosophical Transactions of the Royal Society. 337, 235-242 (1992). (updated data file provided by Peter Brown)	Stibel (see Methods for formula)	P. Brown, Recent human evolution in East Asia and Australasia. Philosophical Transactions of the Royal Society. 337, 235-242 (1992). (updated data file provided by Peter Brown)	-0.051	0.062	-0.423	-5.321	-0.06	-0.36386	-1.01	26.76		331
603	465	AM Homo	1390	1390	1340.13	0.25	1	2	Europe	United Kingdom	P. Brown, Recent human evolution in East Asia and Australasia. Philosophical Transactions of the Royal Society. 337, 235-242 (1992). (updated data file provided by Peter Brown)	Stibel (see Methods for formula)	P. Brown, Recent human evolution in East Asia and Australasia. Philosophical Transactions of the Royal Society. 337, 235-242 (1992). (updated data file provided by Peter Brown)	-0.051	0.062	-0.423	-5.321	-0.06	-0.36386	-1.01	26.76		331
604	169	AM Homo	1120	1120	1085.43	0.25	1	2	Europe	United Kingdom	P. Brown, Recent human evolution in East Asia and Australasia. Philosophical Transactions of the Royal Society. 337, 235-242 (1992). (updated data file provided by Peter Brown)	Stibel (see Methods for formula)	P. Brown, Recent human evolution in East Asia and Australasia. Philosophical Transactions of the Royal Society. 337, 235-242 (1992). (updated data file provided by Peter Brown)	-0.051	0.062	-0.423	-5.321	-0.06	-0.36386	-1.01	26.76		331
605	184	AM Homo	1270	1270	1227.09	0.25	1	2	Europe	United Kingdom	P. Brown, Recent human evolution in East Asia and Australasia. Philosophical Transactions of the Royal Society. 337, 235-242 (1992). (updated data file provided by Peter Brown)	Stibel (see Methods for formula)	P. Brown, Recent human evolution in East Asia and Australasia. Philosophical Transactions of the Royal Society. 337, 235-242 (1992). (updated data file provided by Peter Brown)	-0.051	0.062	-0.423	-5.321	-0.06	-0.36386	-1.01	26.76		331
606	500	AM Homo	1455	1455	1401.26	0.25	1	2	Europe	United Kingdom	P. Brown, Recent human evolution in East Asia and Australasia. Philosophical Transactions of the Royal Society. 337, 235-242 (1992). (updated data file provided by Peter Brown)	Stibel (see Methods for formula)	P. Brown, Recent human evolution in East Asia and Australasia. Philosophical Transactions of the Royal Society. 337, 235-242 (1992). (updated data file provided by Peter Brown)	-0.051	0.062	-0.423	-5.321	-0.06	-0.36386	-1.01	26.76		331
607	667	AM Homo	1190	1190	1151.59	0.25	1	2	Europe	United Kingdom	P. Brown, Recent human evolution in East Asia and Australasia. Philosophical Transactions of the Royal Society. 337, 235-242 (1992). (updated data file provided by Peter Brown)	Stibel (see Methods for formula)	P. Brown, Recent human evolution in East Asia and Australasia. Philosophical Transactions of the Royal Society. 337, 235-242 (1992). (updated data file provided by Peter Brown)	-0.051	0.062	-0.423	-5.321	-0.06	-0.36386	-1.01	26.76		331
608	708	AM Homo	1240	1240	1198.79	0.25	1	2	Europe	United Kingdom	P. Brown, Recent human evolution in East Asia and Australasia. Philosophical Transactions of the Royal Society. 337, 235-242 (1992). (updated data file provided by Peter Brown)	Stibel (see Methods for formula)	P. Brown, Recent human evolution in East Asia and Australasia. Philosophical Transactions of the Royal Society. 337, 235-242 (1992). (updated data file provided by Peter Brown)	-0.051	0.062	-0.423	-5.321	-0.06	-0.36386	-1.01	26.76		331
609	747	AM Homo	1005	1005	976.512	0.25	1	2	Europe	United Kingdom	P. Brown, Recent human evolution in East Asia and Australasia. Philosophical Transactions of the Royal Society. 337, 235-242 (1992). (updated data file provided by Peter Brown)	Stibel (see Methods for formula)	P. Brown, Recent human evolution in East Asia and Australasia. Philosophical Transactions of the Royal Society. 337, 235-242 (1992). (updated data file provided by Peter Brown)	-0.051	0.062	-0.423	-5.321	-0.06	-0.36386	-1.01	26.76		331
610	843	AM Homo	1350	1350	1302.47	0.25	1	2	Europe	United Kingdom	P. Brown, Recent human evolution in East Asia and Australasia. Philosophical Transactions of the Royal Society. 337, 235-242 (1992). (updated data file provided by Peter Brown)	Stibel (see Methods for formula)	P. Brown, Recent human evolution in East Asia and Australasia. Philosophical Transactions of the Royal Society. 337, 235-242 (1992). (updated data file provided by Peter Brown)	-0.051	0.062	-0.423	-5.321	-0.06	-0.36386	-1.01	26.76		331
611	872	AM Homo	1175	1175	1137.42	0.25	1	2	Europe	United Kingdom	P. Brown, Recent human evolution in East Asia and Australasia. Philosophical Transactions of the Royal Society. 337, 235-242 (1992). (updated data file provided by Peter Brown)	Stibel (see Methods for formula)	P. Brown, Recent human evolution in East Asia and Australasia. Philosophical Transactions of the Royal Society. 337, 235-242 (1992). (updated data file provided by Peter Brown)	-0.051	0.062	-0.423	-5.321	-0.06	-0.36386	-1.01	26.76		331
612	957	AM Homo	1230	1230	1189.35	0.25	1	2	Europe	United Kingdom	P. Brown, Recent human evolution in East Asia and Australasia. Philosophical Transactions of the Royal Society. 337, 235-242 (1992). (updated data file provided by Peter Brown)	Stibel (see Methods for formula)	P. Brown, Recent human evolution in East Asia and Australasia. Philosophical Transactions of the Royal Society. 337, 235-242 (1992). (updated data file provided by Peter Brown)	-0.051	0.062	-0.423	-5.321	-0.06	-0.36386	-1.01	26.76		331
613	368	AM Homo	1260	1260	1217.66	0.25	1	2	Europe	United Kingdom	P. Brown, Recent human evolution in East Asia and Australasia. Philosophical Transactions of the Royal Society. 337, 235-242 (1992). (updated data file provided by Peter Brown)	Stibel (see Methods for formula)	P. Brown, Recent human evolution in East Asia and Australasia. Philosophical Transactions of the Royal Society. 337, 235-242 (1992). (updated data file provided by Peter Brown)	-0.051	0.062	-0.423	-5.321	-0.06	-0.36386	-1.01	26.76		331
614	507	AM Homo	1165	1165	1127.97	0.25	1	2	Europe	United Kingdom	P. Brown, Recent human evolution in East Asia and Australasia. Philosophical Transactions of the Royal Society. 337, 235-242 (1992). (updated data file provided by Peter Brown)	Stibel (see Methods for formula)	P. Brown, Recent human evolution in East Asia and Australasia. Philosophical Transactions of the Royal Society. 337, 235-242 (1992). (updated data file provided by Peter Brown)	-0.051	0.062	-0.423	-5.321	-0.06	-0.36386	-1.01	26.76		331
615	956	AM Homo	1230	1230	1189.35	0.25	1	2	Europe	United Kingdom	P. Brown, Recent human evolution in East Asia and Australasia. Philosophical Transactions of the Royal Society. 337, 235-242 (1992). (updated data file provided by Peter Brown)	Stibel (see Methods for formula)	P. Brown, Recent human evolution in East Asia and Australasia. Philosophical Transactions of the Royal Society. 337, 235-242 (1992). (updated data file provided by Peter Brown)	-0.051	0.062	-0.423	-5.321	-0.06	-0.36386	-1.01	26.76		331
616	809	AM Homo	1215	1215	1175.19	0.25	1	2	Europe	United Kingdom	P. Brown, Recent human evolution in East Asia and Australasia. Philosophical Transactions of the Royal Society. 337, 235-242 (1992). (updated data file provided by Peter Brown)	Stibel (see Methods for formula)	P. Brown, Recent human evolution in East Asia and Australasia. Philosophical Transactions of the Royal Society. 337, 235-242 (1992). (updated data file provided by Peter Brown)	-0.051	0.062	-0.423	-5.321	-0.06	-0.36386	-1.01	26.76		331
617	498	AM Homo	1250	1250	1208.22	0.25	1	2	Europe	United Kingdom	P. Brown, Recent human evolution in East Asia and Australasia. Philosophical Transactions of the Royal Society. 337, 235-242 (1992). (updated data file provided by Peter Brown)	Stibel (see Methods for formula)	P. Brown, Recent human evolution in East Asia and Australasia. Philosophical Transactions of the Royal Society. 337, 235-242 (1992). (updated data file provided by Peter Brown)	-0.051	0.062	-0.423	-5.321	-0.06	-0.36386	-1.01	26.76		331
60	Dias Negress (Winkler and Winkler-Holler 1988)	AM Homo	1556	1556	1496.11	0.463	2	1	Sub-Saharan Africa	Namibia	M. J. Henneberg, M. Steyn, Trends in cranial capacity and cranial index in Subsaharan Africa during the Holocene. American Journal of Human Biology. 5, 473-479 (1993).	Stibel (see Methods for formula)	M. J. Henneberg, M. Steyn, Trends in cranial capacity and cranial index in Subsaharan Africa during the Holocene. American Journal of Human Biology. 5, 473-479 (1993).	-0.574	-0.643	-0.652	-5.167	-0.06	-0.36386	-1.01	25.11		-195
243	Stoutpansberg (Steyn and Loots unpublished)	AM Homo	1464	1464	1409.72	0.555	2	1	Sub-Saharan Africa	South Africa	M. J. Henneberg, M. Steyn, Trends in cranial capacity and cranial index in Subsaharan Africa during the Holocene. American Journal of Human Biology. 5, 473-479 (1993).	Stibel (see Methods for formula)	M. J. Henneberg, M. Steyn, Trends in cranial capacity and cranial index in Subsaharan Africa during the Holocene. American Journal of Human Biology. 5, 473-479 (1993).	-0.348	-1.08	0.545	-5.646	-0.06	-0.36386	-1.01	23.47	-0.0295	60
220	Schroda (De Villiers 1980)	AM Homo	1430	1430	1377.75	0.589	2	1	Sub-Saharan Africa		M. J. Henneberg, M. Steyn, Trends in cranial capacity and cranial index in Subsaharan Africa during the Holocene. American Journal of Human Biology. 5, 473-479 (1993).	Stibel (see Methods for formula)	M. J. Henneberg, M. Steyn, Trends in cranial capacity and cranial index in Subsaharan Africa during the Holocene. American Journal of Human Biology. 5, 473-479 (1993).	-0.348	-1.08	0.545	-5.646	-0.06	-0.36386	-1.01	24.89	-0.0295	60
173	Olifantspoort (De Villiers 1972)	AM Homo	1421	1421	1369.29	0.598	2	1	Sub-Saharan Africa		M. J. Henneberg, M. Steyn, Trends in cranial capacity and cranial index in Subsaharan Africa during the Holocene. American Journal of Human Biology. 5, 473-479 (1993).	Stibel (see Methods for formula)	M. J. Henneberg, M. Steyn, Trends in cranial capacity and cranial index in Subsaharan Africa during the Holocene. American Journal of Human Biology. 5, 473-479 (1993).	-0.348	-1.08	0.545	-5.646	-0.06	-0.36386	-1.01	24.89	-0.0295	-148
180	Orange Free State (De Villiers 1972)	AM Homo	1376	1376	1326.95	0.643	1	1	Sub-Saharan Africa	South Africa	M. J. Henneberg, M. Steyn, Trends in cranial capacity and cranial index in Subsaharan Africa during the Holocene. American Journal of Human Biology. 5, 473-479 (1993).	Stibel (see Methods for formula)	M. J. Henneberg, M. Steyn, Trends in cranial capacity and cranial index in Subsaharan Africa during the Holocene. American Journal of Human Biology. 5, 473-479 (1993).	0.291	-1.08	0.545	-5.646	-0.06	-0.36386	-1.01	24.89	-0.0295	-192
36	Cape Flats (Drennan 1929)	AM Homo	1344	1344	1296.82	0.675	2	1	Sub-Saharan Africa	South Africa	M. J. Henneberg, M. Steyn, Trends in cranial capacity and cranial index in Subsaharan Africa during the Holocene. American Journal of Human Biology. 5, 473-479 (1993).	Stibel (see Methods for formula)	M. J. Henneberg, M. Steyn, Trends in cranial capacity and cranial index in Subsaharan Africa during the Holocene. American Journal of Human Biology. 5, 473-479 (1993).	0.291	0.053	-0.53	-5.311	-0.06	-0.36386	-1.01	24.89	-0.0295	-192
174	Olifantspoort (De Villiers 1972)	AM Homo	1332	1332	1285.52	0.687	1	1	Sub-Saharan Africa		M. J. Henneberg, M. Steyn, Trends in cranial capacity and cranial index in Subsaharan Africa during the Holocene. American Journal of Human Biology. 5, 473-479 (1993).	Stibel (see Methods for formula)	M. J. Henneberg, M. Steyn, Trends in cranial capacity and cranial index in Subsaharan Africa during the Holocene. American Journal of Human Biology. 5, 473-479 (1993).	0.291	0.053	-0.53	-5.311	-0.06	-0.36386	-1.01	24.89	-0.0295	89
29	Broederstroom (De Villiers unpublished)	AM Homo	1232	1232	1191.24	0.787	1	1	Sub-Saharan Africa	South Africa	M. J. Henneberg, M. Steyn, Trends in cranial capacity and cranial index in Subsaharan Africa during the Holocene. American Journal of Human Biology. 5, 473-479 (1993).	Stibel (see Methods for formula)	M. J. Henneberg, M. Steyn, Trends in cranial capacity and cranial index in Subsaharan Africa during the Holocene. American Journal of Human Biology. 5, 473-479 (1993).	-0.796	-0.212	-0.468	-5.478	-0.06	-0.36386	-1.01	30.11	-0.0295	88
279	Xhosa Pretoria (Schoombee unpublished)	AM Homo	1228	1228	1187.47	0.791	1	1	Sub-Saharan Africa	South Africa	M. J. Henneberg, M. Steyn, Trends in cranial capacity and cranial index in Subsaharan Africa during the Holocene. American Journal of Human Biology. 5, 473-479 (1993).	Stibel (see Methods for formula)	M. J. Henneberg, M. Steyn, Trends in cranial capacity and cranial index in Subsaharan Africa during the Holocene. American Journal of Human Biology. 5, 473-479 (1993).	-0.796	-0.212	-0.468	-5.478	-0.06	-0.36386	-1.01	30.11	-0.0295	88
295	Gamtoos (De Villiers 1965)	AM Homo	1215	1215	1175.19	0.804	2	1	Sub-Saharan Africa	South Africa	M. J. Henneberg, M. Steyn, Trends in cranial capacity and cranial index in Subsaharan Africa during the Holocene. American Journal of Human Biology. 5, 473-479 (1993).	Stibel (see Methods for formula)	M. J. Henneberg, M. Steyn, Trends in cranial capacity and cranial index in Subsaharan Africa during the Holocene. American Journal of Human Biology. 5, 473-479 (1993).	-0.796	-0.212	-0.468	-5.478	-0.06	-0.36386	-1.01	30.11	-0.0295	63
113	Gold Mines Zimbabwe (Keith 1924-1925)	AM Homo	1161	1161	1124.19	0.858	2	1	Sub-Saharan Africa	Zimbabwe	M. J. Henneberg, M. Steyn, Trends in cranial capacity and cranial index in Subsaharan Africa during the Holocene. American Journal of Human Biology. 5, 473-479 (1993).	Stibel (see Methods for formula)	M. J. Henneberg, M. Steyn, Trends in cranial capacity and cranial index in Subsaharan Africa during the Holocene. American Journal of Human Biology. 5, 473-479 (1993).	0.464	0.295	-0.402	-5.82	-0.06	-0.36386	-1.01	30.11	-0.0295	-260
141	Munro (De Villiers unpublished)	AM Homo	1134	1134	1098.67	0.885	2	1	Sub-Saharan Africa		M. J. Henneberg, M. Steyn, Trends in cranial capacity and cranial index in Subsaharan Africa during the Holocene. American Journal of Human Biology. 5, 473-479 (1993).	Stibel (see Methods for formula)	M. J. Henneberg, M. Steyn, Trends in cranial capacity and cranial index in Subsaharan Africa during the Holocene. American Journal of Human Biology. 5, 473-479 (1993).	0.464	0.295	-0.402	-5.82	-0.06	-0.36386	-1.01	24.35	-0.0295	133
618	Pecos. (Data collected from Hooton, E.A.)	AM Homo	1300	1300	1255.37	1	1	2	North America	United States	C. B. Ruff, E. Trinkaus, T. W. Holliday, Body mass and encephalization in Pleistocene Homo. Nature. 387, 173-176 (1997). (updated data file provided by Chris Ruff)	Stibel (see Methods for formula)	C. B. Ruff, E. Trinkaus, T. W. Holliday, Body mass and encephalization in Pleistocene Homo. Nature. 387, 173-176 (1997). (updated data file provided by Chris Ruff)	-0.322	-0.165	-0.685	-6.114	-0.06	-0.36386	-1.01	25	-0.0872	-17
619	Pecos. (Data collected from Hooton, E.A.)	AM Homo	1030	1030	1000.21	1	1	2	North America	United States	C. B. Ruff, E. Trinkaus, T. W. Holliday, Body mass and encephalization in Pleistocene Homo. Nature. 387, 173-176 (1997). (updated data file provided by Chris Ruff)	Stibel (see Methods for formula)	C. B. Ruff, E. Trinkaus, T. W. Holliday, Body mass and encephalization in Pleistocene Homo. Nature. 387, 173-176 (1997). (updated data file provided by Chris Ruff)	-0.322	-0.165	-0.685	-6.114	-0.06	-0.36386	-1.01	25	-0.0872	-17
620	Pecos. (Data collected from Hooton, E.A.)	AM Homo	1275	1275	1231.8	1	1	2	North America	United States	C. B. Ruff, E. Trinkaus, T. W. Holliday, Body mass and encephalization in Pleistocene Homo. Nature. 387, 173-176 (1997). (updated data file provided by Chris Ruff)	Stibel (see Methods for formula)	C. B. Ruff, E. Trinkaus, T. W. Holliday, Body mass and encephalization in Pleistocene Homo. Nature. 387, 173-176 (1997). (updated data file provided by Chris Ruff)	-0.322	-0.165	-0.685	-6.114	-0.06	-0.36386	-1.01	25	-0.0872	-17
621	Pecos. (Data collected from Hooton, E.A.)	AM Homo	1300	1300	1255.37	1	2	2	North America	United States	C. B. Ruff, E. Trinkaus, T. W. Holliday, Body mass and encephalization in Pleistocene Homo. Nature. 387, 173-176 (1997). (updated data file provided by Chris Ruff)	Stibel (see Methods for formula)	C. B. Ruff, E. Trinkaus, T. W. Holliday, Body mass and encephalization in Pleistocene Homo. Nature. 387, 173-176 (1997). (updated data file provided by Chris Ruff)	-0.322	-0.165	-0.685	-6.114	-0.06	-0.36386	-1.01	25	-0.0872	-17
622	Pecos. (Data collected from Hooton, E.A.)	AM Homo	1120	1120	1085.43	1	1	2	North America	United States	C. B. Ruff, E. Trinkaus, T. W. Holliday, Body mass and encephalization in Pleistocene Homo. Nature. 387, 173-176 (1997). (updated data file provided by Chris Ruff)	Stibel (see Methods for formula)	C. B. Ruff, E. Trinkaus, T. W. Holliday, Body mass and encephalization in Pleistocene Homo. Nature. 387, 173-176 (1997). (updated data file provided by Chris Ruff)	-0.322	-0.165	-0.685	-6.114	-0.06	-0.36386	-1.01	25	-0.0872	-17
623	Pecos. (Data collected from Hooton, E.A.)	AM Homo	1380	1380	1330.72	1	1	2	North America	United States	C. B. Ruff, E. Trinkaus, T. W. Holliday, Body mass and encephalization in Pleistocene Homo. Nature. 387, 173-176 (1997). (updated data file provided by Chris Ruff)	Stibel (see Methods for formula)	C. B. Ruff, E. Trinkaus, T. W. Holliday, Body mass and encephalization in Pleistocene Homo. Nature. 387, 173-176 (1997). (updated data file provided by Chris Ruff)	-0.322	-0.165	-0.685	-6.114	-0.06	-0.36386	-1.01	25	-0.0872	-17
624	Pecos. (Data collected from Hooton, E.A.)	AM Homo	1380	1380	1330.72	1	2	2	North America	United States	C. B. Ruff, E. Trinkaus, T. W. Holliday, Body mass and encephalization in Pleistocene Homo. Nature. 387, 173-176 (1997). (updated data file provided by Chris Ruff)	Stibel (see Methods for formula)	C. B. Ruff, E. Trinkaus, T. W. Holliday, Body mass and encephalization in Pleistocene Homo. Nature. 387, 173-176 (1997). (updated data file provided by Chris Ruff)	-0.322	-0.165	-0.685	-6.114	-0.06	-0.36386	-1.01	25	-0.0872	-17
625	Pecos. (Data collected from Hooton, E.A.)	AM Homo	1270	1270	1227.09	1	2	2	North America	United States	C. B. Ruff, E. Trinkaus, T. W. Holliday, Body mass and encephalization in Pleistocene Homo. Nature. 387, 173-176 (1997). (updated data file provided by Chris Ruff)	Stibel (see Methods for formula)	C. B. Ruff, E. Trinkaus, T. W. Holliday, Body mass and encephalization in Pleistocene Homo. Nature. 387, 173-176 (1997). (updated data file provided by Chris Ruff)	-0.322	-0.165	-0.685	-6.114	-0.06	-0.36386	-1.01	25	-0.0872	-17
626	Pecos. (Data collected from Hooton, E.A.)	AM Homo	1100	1100	1066.5	1	1	2	North America	United States	C. B. Ruff, E. Trinkaus, T. W. Holliday, Body mass and encephalization in Pleistocene Homo. Nature. 387, 173-176 (1997). (updated data file provided by Chris Ruff)	Stibel (see Methods for formula)	C. B. Ruff, E. Trinkaus, T. W. Holliday, Body mass and encephalization in Pleistocene Homo. Nature. 387, 173-176 (1997). (updated data file provided by Chris Ruff)	-0.322	-0.165	-0.685	-6.114	-0.06	-0.36386	-1.01	25	-0.0872	-17
627	Pecos. (Data collected from Hooton, E.A.)	AM Homo	1465	1465	1410.66	1	2	2	North America	United States	C. B. Ruff, E. Trinkaus, T. W. Holliday, Body mass and encephalization in Pleistocene Homo. Nature. 387, 173-176 (1997). (updated data file provided by Chris Ruff)	Stibel (see Methods for formula)	C. B. Ruff, E. Trinkaus, T. W. Holliday, Body mass and encephalization in Pleistocene Homo. Nature. 387, 173-176 (1997). (updated data file provided by Chris Ruff)	-0.322	-0.165	-0.685	-6.114	-0.06	-0.36386	-1.01	25	-0.0872	-17
628	Pecos. (Data collected from Hooton, E.A.)	AM Homo	1320	1320	1274.22	1	2	2	North America	United States	C. B. Ruff, E. Trinkaus, T. W. Holliday, Body mass and encephalization in Pleistocene Homo. Nature. 387, 173-176 (1997). (updated data file provided by Chris Ruff)	Stibel (see Methods for formula)	C. B. Ruff, E. Trinkaus, T. W. Holliday, Body mass and encephalization in Pleistocene Homo. Nature. 387, 173-176 (1997). (updated data file provided by Chris Ruff)	-0.322	-0.165	-0.685	-6.114	-0.06	-0.36386	-1.01	25	-0.0872	-17
629	Pecos. (Data collected from Hooton, E.A.)	AM Homo	1285	1285	1241.23	1	1	2	North America	United States	C. B. Ruff, E. Trinkaus, T. W. Holliday, Body mass and encephalization in Pleistocene Homo. Nature. 387, 173-176 (1997). (updated data file provided by Chris Ruff)	Stibel (see Methods for formula)	C. B. Ruff, E. Trinkaus, T. W. Holliday, Body mass and encephalization in Pleistocene Homo. Nature. 387, 173-176 (1997). (updated data file provided by Chris Ruff)	-0.322	-0.165	-0.685	-6.114	-0.06	-0.36386	-1.01	25	-0.0872	-17
630	Pecos. (Data collected from Hooton, E.A.)	AM Homo	1350	1350	1302.47	1	2	2	North America	United States	C. B. Ruff, E. Trinkaus, T. W. Holliday, Body mass and encephalization in Pleistocene Homo. Nature. 387, 173-176 (1997). (updated data file provided by Chris Ruff)	Stibel (see Methods for formula)	C. B. Ruff, E. Trinkaus, T. W. Holliday, Body mass and encephalization in Pleistocene Homo. Nature. 387, 173-176 (1997). (updated data file provided by Chris Ruff)	-0.322	-0.165	-0.685	-6.114	-0.06	-0.36386	-1.01	25	-0.0872	-17
631	Pecos. (Data collected from Hooton, E.A.)	AM Homo	1440	1440	1387.16	1	2	2	North America	United States	C. B. Ruff, E. Trinkaus, T. W. Holliday, Body mass and encephalization in Pleistocene Homo. Nature. 387, 173-176 (1997). (updated data file provided by Chris Ruff)	Stibel (see Methods for formula)	C. B. Ruff, E. Trinkaus, T. W. Holliday, Body mass and encephalization in Pleistocene Homo. Nature. 387, 173-176 (1997). (updated data file provided by Chris Ruff)	-0.322	-0.165	-0.685	-6.114	-0.06	-0.36386	-1.01	25	-0.0872	-17
632	Pecos. (Data collected from Hooton, E.A.)	AM Homo	1410	1410	1358.94	1	2	2	North America	United States	C. B. Ruff, E. Trinkaus, T. W. Holliday, Body mass and encephalization in Pleistocene Homo. Nature. 387, 173-176 (1997). (updated data file provided by Chris Ruff)	Stibel (see Methods for formula)	C. B. Ruff, E. Trinkaus, T. W. Holliday, Body mass and encephalization in Pleistocene Homo. Nature. 387, 173-176 (1997). (updated data file provided by Chris Ruff)	-0.322	-0.165	-0.685	-6.114	-0.06	-0.36386	-1.01	25	-0.0872	-17
633	Pecos. (Data collected from Hooton, E.A.)	AM Homo	1350	1350	1302.47	1	1	2	North America	United States	C. B. Ruff, E. Trinkaus, T. W. Holliday, Body mass and encephalization in Pleistocene Homo. Nature. 387, 173-176 (1997). (updated data file provided by Chris Ruff)	Stibel (see Methods for formula)	C. B. Ruff, E. Trinkaus, T. W. Holliday, Body mass and encephalization in Pleistocene Homo. Nature. 387, 173-176 (1997). (updated data file provided by Chris Ruff)	-0.322	-0.165	-0.685	-6.114	-0.06	-0.36386	-1.01	25	-0.0872	-17
634	Pecos. (Data collected from Hooton, E.A.)	AM Homo	1190	1190	1151.59	1	1	2	North America	United States	C. B. Ruff, E. Trinkaus, T. W. Holliday, Body mass and encephalization in Pleistocene Homo. Nature. 387, 173-176 (1997). (updated data file provided by Chris Ruff)	Stibel (see Methods for formula)	C. B. Ruff, E. Trinkaus, T. W. Holliday, Body mass and encephalization in Pleistocene Homo. Nature. 387, 173-176 (1997). (updated data file provided by Chris Ruff)	-0.322	-0.165	-0.685	-6.114	-0.06	-0.36386	-1.01	25	-0.0872	-17
635	Pecos. (Data collected from Hooton, E.A.)	AM Homo	1300	1300	1255.37	1	2	2	North America	United States	C. B. Ruff, E. Trinkaus, T. W. Holliday, Body mass and encephalization in Pleistocene Homo. Nature. 387, 173-176 (1997). (updated data file provided by Chris Ruff)	Stibel (see Methods for formula)	C. B. Ruff, E. Trinkaus, T. W. Holliday, Body mass and encephalization in Pleistocene Homo. Nature. 387, 173-176 (1997). (updated data file provided by Chris Ruff)	-0.322	-0.165	-0.685	-6.114	-0.06	-0.36386	-1.01	25	-0.0872	-17
636	Pecos. (Data collected from Hooton, E.A.)	AM Homo	1390	1390	1340.13	1	1	2	North America	United States	C. B. Ruff, E. Trinkaus, T. W. Holliday, Body mass and encephalization in Pleistocene Homo. Nature. 387, 173-176 (1997). (updated data file provided by Chris Ruff)	Stibel (see Methods for formula)	C. B. Ruff, E. Trinkaus, T. W. Holliday, Body mass and encephalization in Pleistocene Homo. Nature. 387, 173-176 (1997). (updated data file provided by Chris Ruff)	-0.322	-0.165	-0.685	-6.114	-0.06	-0.36386	-1.01	25	-0.0872	-17
637	Pecos. (Data collected from Hooton, E.A.)	AM Homo	1350	1350	1302.47	1	1	2	North America	United States	C. B. Ruff, E. Trinkaus, T. W. Holliday, Body mass and encephalization in Pleistocene Homo. Nature. 387, 173-176 (1997). (updated data file provided by Chris Ruff)	Stibel (see Methods for formula)	C. B. Ruff, E. Trinkaus, T. W. Holliday, Body mass and encephalization in Pleistocene Homo. Nature. 387, 173-176 (1997). (updated data file provided by Chris Ruff)	-0.322	-0.165	-0.685	-6.114	-0.06	-0.36386	-1.01	25	-0.0872	-17
638	Pecos. (Data collected from Hooton, E.A.)	AM Homo	1140	1140	1104.34	1	1	2	North America	United States	C. B. Ruff, E. Trinkaus, T. W. Holliday, Body mass and encephalization in Pleistocene Homo. Nature. 387, 173-176 (1997). (updated data file provided by Chris Ruff)	Stibel (see Methods for formula)	C. B. Ruff, E. Trinkaus, T. W. Holliday, Body mass and encephalization in Pleistocene Homo. Nature. 387, 173-176 (1997). (updated data file provided by Chris Ruff)	-0.322	-0.165	-0.685	-6.114	-0.06	-0.36386	-1.01	25	-0.0872	-17
639	Pecos. (Data collected from Hooton, E.A.)	AM Homo	1155	1155	1118.52	1	1	2	North America	United States	C. B. Ruff, E. Trinkaus, T. W. Holliday, Body mass and encephalization in Pleistocene Homo. Nature. 387, 173-176 (1997). (updated data file provided by Chris Ruff)	Stibel (see Methods for formula)	C. B. Ruff, E. Trinkaus, T. W. Holliday, Body mass and encephalization in Pleistocene Homo. Nature. 387, 173-176 (1997). (updated data file provided by Chris Ruff)	-0.322	-0.165	-0.685	-6.114	-0.06	-0.36386	-1.01	25	-0.0872	-17
640	Pecos. (Data collected from Hooton, E.A.)	AM Homo	1178	1178	1140.25	1	1	2	North America	United States	C. B. Ruff, E. Trinkaus, T. W. Holliday, Body mass and encephalization in Pleistocene Homo. Nature. 387, 173-176 (1997). (updated data file provided by Chris Ruff)	Stibel (see Methods for formula)	C. B. Ruff, E. Trinkaus, T. W. Holliday, Body mass and encephalization in Pleistocene Homo. Nature. 387, 173-176 (1997). (updated data file provided by Chris Ruff)	-0.322	-0.165	-0.685	-6.114	-0.06	-0.36386	-1.01	25	-0.0872	-17
641	Pecos. (Data collected from Hooton, E.A.)	AM Homo	1340	1340	1293.06	1	2	2	North America	United States	C. B. Ruff, E. Trinkaus, T. W. Holliday, Body mass and encephalization in Pleistocene Homo. Nature. 387, 173-176 (1997). (updated data file provided by Chris Ruff)	Stibel (see Methods for formula)	C. B. Ruff, E. Trinkaus, T. W. Holliday, Body mass and encephalization in Pleistocene Homo. Nature. 387, 173-176 (1997). (updated data file provided by Chris Ruff)	-0.322	-0.165	-0.685	-6.114	-0.06	-0.36386	-1.01	25	-0.0872	-17
642	Pecos. (Data collected from Hooton, E.A.)	AM Homo	1500	1500	1443.54	1	2	2	North America	United States	C. B. Ruff, E. Trinkaus, T. W. Holliday, Body mass and encephalization in Pleistocene Homo. Nature. 387, 173-176 (1997). (updated data file provided by Chris Ruff)	Stibel (see Methods for formula)	C. B. Ruff, E. Trinkaus, T. W. Holliday, Body mass and encephalization in Pleistocene Homo. Nature. 387, 173-176 (1997). (updated data file provided by Chris Ruff)	-0.322	-0.165	-0.685	-6.114	-0.06	-0.36386	-1.01	25	-0.0872	-17
643	Pecos. (Data collected from Hooton, E.A.)	AM Homo	1550	1550	1490.48	1	2	2	North America	United States	C. B. Ruff, E. Trinkaus, T. W. Holliday, Body mass and encephalization in Pleistocene Homo. Nature. 387, 173-176 (1997). (updated data file provided by Chris Ruff)	Stibel (see Methods for formula)	C. B. Ruff, E. Trinkaus, T. W. Holliday, Body mass and encephalization in Pleistocene Homo. Nature. 387, 173-176 (1997). (updated data file provided by Chris Ruff)	-0.322	-0.165	-0.685	-6.114	-0.06	-0.36386	-1.01	25	-0.0872	-17
644	Pecos. (Data collected from Hooton, E.A.)	AM Homo	1400	1400	1349.54	1	2	2	North America	United States	C. B. Ruff, E. Trinkaus, T. W. Holliday, Body mass and encephalization in Pleistocene Homo. Nature. 387, 173-176 (1997). (updated data file provided by Chris Ruff)	Stibel (see Methods for formula)	C. B. Ruff, E. Trinkaus, T. W. Holliday, Body mass and encephalization in Pleistocene Homo. Nature. 387, 173-176 (1997). (updated data file provided by Chris Ruff)	-0.322	-0.165	-0.685	-6.114	-0.06	-0.36386	-1.01	25	-0.0872	-17
645	Pecos. (Data collected from Hooton, E.A.)	AM Homo	1350	1350	1302.47	1	2	2	North America	United States	C. B. Ruff, E. Trinkaus, T. W. Holliday, Body mass and encephalization in Pleistocene Homo. Nature. 387, 173-176 (1997). (updated data file provided by Chris Ruff)	Stibel (see Methods for formula)	C. B. Ruff, E. Trinkaus, T. W. Holliday, Body mass and encephalization in Pleistocene Homo. Nature. 387, 173-176 (1997). (updated data file provided by Chris Ruff)	-0.322	-0.165	-0.685	-6.114	-0.06	-0.36386	-1.01	25	-0.0872	-17
646	Pecos. (Data collected from Hooton, E.A.)	AM Homo	1325	1325	1278.93	1	1	2	North America	United States	C. B. Ruff, E. Trinkaus, T. W. Holliday, Body mass and encephalization in Pleistocene Homo. Nature. 387, 173-176 (1997). (updated data file provided by Chris Ruff)	Stibel (see Methods for formula)	C. B. Ruff, E. Trinkaus, T. W. Holliday, Body mass and encephalization in Pleistocene Homo. Nature. 387, 173-176 (1997). (updated data file provided by Chris Ruff)	-0.322	-0.165	-0.685	-6.114	-0.06	-0.36386	-1.01	25	-0.0872	-17
66	Elementeita (Leakey 1935)	AM Homo	1585	1585	1523.32	2.019	2	1	Sub-Saharan Africa	Kenya	M. J. Henneberg, M. Steyn, Trends in cranial capacity and cranial index in Subsaharan Africa during the Holocene. American Journal of Human Biology. 5, 473-479 (1993).	Stibel (see Methods for formula)		-0.408	-0.116	-2.19	-7.915	-0.06	-0.36386	-1.01	25.77	0.0731	293
110	Kafue Zambia (Gabel 1962)	AM Homo	1340	1340	1293.06	3.019	1	1	Sub-Saharan Africa	Zambia	M. J. Henneberg, M. Steyn, Trends in cranial capacity and cranial index in Subsaharan Africa during the Holocene. American Journal of Human Biology. 5, 473-479 (1993).	Stibel (see Methods for formula)		-0.27	-0.604	-4.385	-9.314	-0.06	-0.36386	-1.01	26.27	0.1563	-41
33	Byneskranskop (De Villiers and Wilson 1982)	AM Homo	1439	1439	1386.22	3.119	2	1	Sub-Saharan Africa	South Africa	M. J. Henneberg, M. Steyn, Trends in cranial capacity and cranial index in Subsaharan Africa during the Holocene. American Journal of Human Biology. 5, 473-479 (1993).	Stibel (see Methods for formula)		0.385	-1.436	-4.264	-9.076	-0.06	-0.36386	-1.01	26.27	0.1563	47
34	Byneskranskop (De Villiers and Wilson 1982)	AM Homo	1385	1385	1335.42	3.119	1	1	Sub-Saharan Africa	South Africa	M. J. Henneberg, M. Steyn, Trends in cranial capacity and cranial index in Subsaharan Africa during the Holocene. American Journal of Human Biology. 5, 473-479 (1993).	Stibel (see Methods for formula)		0.385	-1.436	-4.264	-9.076	-0.06	-0.36386	-1.01	26.27	0.1563	47
158	Ofnet 21.1	AM Homo	1500	1500	1443.54	7.5	2	2	Europe	Germany	K. L. Beals, C. L. Smith, S.M. Dodd, Brain size, cranial morphology, climate, and time machines. Current Anthropology. 3, 301-330 (1984).	Stibel (see Methods for formula)	Hedges et al., 1989	-1.297	-3.64	-9.466	-9.081	-0.67	-0.36386	-1.01	24.13	0.7671	35
159	Ofnet 24.1	AM Homo	1420	1420	1368.35	7.5	2	2	Europe	Germany	K. L. Beals, C. L. Smith, S.M. Dodd, Brain size, cranial morphology, climate, and time machines. Current Anthropology. 3, 301-330 (1984).	Stibel (see Methods for formula)	Hedges et al., 1989	-1.297	-3.64	-9.466	-9.081	-0.67	-0.36386	-1.01	24.13	0.7671	35
49	Combe Capelle	AM Homo	1440	1440	1387.16	9.5		2	Europe	France	C. De Miguel, M. Henneberg, Variation in hominid brain size: How much is due to method? Homo. 52, 3-58 (2001).	Stibel (see Methods for formula)	Hoffmann et al., 2011	0.034	-3.636	-9.496	-9.796	-0.67	-0.36386	-1.01	27.09	0.3784	171
48	Cohuna	AM Homo	1450	1355	1307.18	10		2	Australia	Australia	C. De Miguel, M. Henneberg, Variation in hominid brain size: How much is due to method? Homo. 52, 3-58 (2001).	Stibel (see Methods for formula)		-0.317	-5.167	-10.008	-9.606	-0.67	-5.31458	-1.01	25.83	0.2108	-6
257	Tepexpan	AM Homo	1540	1540	1481.1	10		2	North America	Mexico	C. De Miguel, M. Henneberg, Variation in hominid brain size: How much is due to method? Homo. 52, 3-58 (2001).	Stibel (see Methods for formula)		-0.317	-5.167	-10.008	-9.606	-0.67	-5.31458	-1.01	25.83	0.2108	-6
264	Tze-Yang	AM Homo	1210	1210	1170.47	10		2	Asia	China	C. De Miguel, M. Henneberg, Variation in hominid brain size: How much is due to method? Homo. 52, 3-58 (2001).	Stibel (see Methods for formula)		-0.317	-5.167	-10.008	-9.606	-0.67	-5.31458	-1.01	25.83	0.2108	-6
292	Gamble's Cave	AM Homo	1500	1500	1443.54	10		1	Sub-Saharan Africa	Kenya	C. De Miguel, M. Henneberg, Variation in hominid brain size: How much is due to method? Homo. 52, 3-58 (2001).	Stibel (see Methods for formula)		-0.317	-5.167	-10.008	-9.606	-0.67	-5.31458	-1.01	25.83	0.2108	-6
293	Gamble's Cave 4	AM Homo	1470	1470	1415.35	10		1	Sub-Saharan Africa	Kenya	C. De Miguel, M. Henneberg, Variation in hominid brain size: How much is due to method? Homo. 52, 3-58 (2001).	Stibel (see Methods for formula)		-0.317	-5.167	-10.008	-9.606	-0.67	-5.31458	-1.01	25.83	0.2108	-6
999	Veyrier 1	AM Homo	1430	1430	1377.75	10	2	2			Ruff, Trinkaus, Holliday (1997) (updated data file provided by lead author)	Stibel (see Methods for formula)		-0.317	-5.167	-10.008	-9.606	-0.67	-5.31458	-1.01	25.83	0.2108	-6
182	Palli Aike 77.3	AM Homo	1480	1480	1424.75	11		2	South America	Chile	C. De Miguel, M. Henneberg, Variation in hominid brain size: How much is due to method? Homo. 52, 3-58 (2001).	Stibel (see Methods for formula)		-0.685	-6.114	-9.458	-9.418	-2.58	-5.31458	-1.01	26.4	0.2126	-443
9	Arene Candide 1	AM Homo	1414	1414	1362.71	12	2	2	Europe	Italy	C. B. Ruff, E. Trinkaus, T. W. Holliday, Body mass and encephalization in Pleistocene Homo. Nature. 387, 173-176 (1997). (updated data file provided by Chris Ruff)	Stibel (see Methods for formula)	Formicola et al., 2005	-2.19	-7.915	-9.297	-9.825	-2.58	-5.31458	-1.01	27.08	-0.1455	209.31
11	Arene Candide 2	AM Homo	1424	1424	1372.11	12	2	2	Europe	Italy	C. B. Ruff, E. Trinkaus, T. W. Holliday, Body mass and encephalization in Pleistocene Homo. Nature. 387, 173-176 (1997). (updated data file provided by Chris Ruff)	Stibel (see Methods for formula)	Formicola et al., 2005	-2.19	-7.915	-9.297	-9.825	-2.58	-5.31458	-1.01	27.08	-0.1455	209.31
12	Arene Candide 4	AM Homo	1520	1520	1462.32	12	2	2	Europe	Italy	C. B. Ruff, E. Trinkaus, T. W. Holliday, Body mass and encephalization in Pleistocene Homo. Nature. 387, 173-176 (1997). (updated data file provided by Chris Ruff)	Stibel (see Methods for formula)	Formicola et al., 2005	-2.19	-7.915	-9.297	-9.825	-2.58	-5.31458	-1.01	27.08	-0.1455	209.31
13	Arene Candide 5	AM Homo	1661	1661	1594.57	12	2	2	Europe	Italy	C. B. Ruff, E. Trinkaus, T. W. Holliday, Body mass and encephalization in Pleistocene Homo. Nature. 387, 173-176 (1997). (updated data file provided by Chris Ruff)	Stibel (see Methods for formula)	Formicola et al., 2005	-2.19	-7.915	-9.297	-9.825	-2.58	-5.31458	-1.01	27.08	-0.1455	209.31
31	Bruniquel 2	AM Homo	1555	1555	1495.18	12	1	2	Europe	France	C. B. Ruff, E. Trinkaus, T. W. Holliday, Body mass and encephalization in Pleistocene Homo. Nature. 387, 173-176 (1997). (updated data file provided by Chris Ruff)	Stibel (see Methods for formula)		-2.19	-7.915	-9.297	-9.825	-2.58	-5.31458	-1.01	27.08	-0.1455	209.31
255	Talgai 1	AM Homo	1300	1335	1288.35	12		1	Australia	Australia	C. De Miguel, M. Henneberg, Variation in hominid brain size: How much is due to method? Homo. 52, 3-58 (2001).	Stibel (see Methods for formula)		-2.19	-7.915	-9.297	-9.825	-2.58	-5.31458	-1.01	27.08	-0.1455	209.31
111	Keilor	AM Homo	1464	1528.5	1470.3	13		2	Australia	Australia	C. De Miguel, M. Henneberg, Variation in hominid brain size: How much is due to method? Homo. 52, 3-58 (2001).	Stibel (see Methods for formula)		-4.385	-9.314	-9.552	-8.795	-2.58	-5.31458	-1.01	27.36	0.0504	-472
294	Gamble's Cave 5 (Leakey 1935)	AM Homo	1530	1530	1471.71	13.509	2	1	Sub-Saharan Africa	Kenya	M. J. Henneberg, M. Steyn, Trends in cranial capacity and cranial index in Subsaharan Africa during the Holocene. American Journal of Human Biology. 5, 473-479 (1993).	Stibel (see Methods for formula)		-4.851	-8.901	-9.08	-8.113	-2.58	-5.31458	-1.01	26.1	-0.013	-483
268	Wadjak 1	AM Homo	1593	1542	1482.97	13.75		1	Asia	Indonesia	C. De Miguel, M. Henneberg, Variation in hominid brain size: How much is due to method? Homo. 52, 3-58 (2001).	Stibel (see Methods for formula)		-4.569	-9.255	-9.096	-9.198	-2.58	-5.31458	-1.01	24.07	0.0026	-176.08
35	Cap Blanc 1	AM Homo	1434	1434	1381.51	14	1	2	Europe	France	C. B. Ruff, E. Trinkaus, T. W. Holliday, Body mass and encephalization in Pleistocene Homo. Nature. 387, 173-176 (1997). (updated data file provided by Chris Ruff)	Stibel (see Methods for formula)		-4.058	-9.16	-9.73	-8.579	-2.58	-5.31458	-1.01	24.39	0.0026	-62.89
156	Oberkassel	AM Homo	1500	1500	1443.54	14	2	2	Europe	Germany	K. L. Beals, C. L. Smith, S.M. Dodd, Brain size, cranial morphology, climate, and time machines. Current Anthropology. 3, 301-330 (1984).	Stibel (see Methods for formula)	Higham et al., 2016	-4.058	-9.16	-9.73	-8.579	-2.58	-5.31458	-1.01	24.39	0.0026	-62.89
489	Oberkassel 2	AM Homo	1338	1338	1291.17	14	1	2	Europe	Germany	De Miguel, Henneberg (2001); Ruff, Trinkaus, Holliday (1997) (updated data file provided by lead author)	Stibel (see Methods for formula)	Higham et al., 2016	-4.058	-9.16	-9.73	-8.579	-2.58	-5.31458	-1.01	24.39	0.0026	-62.89
207	San Teodoro 1	AM Homo	1565	1565	1504.56	15		2	Europe	Italy	C. B. Ruff, E. Trinkaus, T. W. Holliday, Body mass and encephalization in Pleistocene Homo. Nature. 387, 173-176 (1997). (updated data file provided by Chris Ruff)	Stibel (see Methods for formula)	Mannino et al (2011)	-4.052	-10.008	-9.606	-9.445	-2.58	-5.31458	-1.01	24.72	-0.8411	-409
208	San Teodoro 2	AM Homo	1569	1569	1508.31	15		2	Europe	Italy	C. B. Ruff, E. Trinkaus, T. W. Holliday, Body mass and encephalization in Pleistocene Homo. Nature. 387, 173-176 (1997). (updated data file provided by Chris Ruff)	Stibel (see Methods for formula)	Mannino et al (2011)	-4.052	-10.008	-9.606	-9.445	-2.58	-5.31458	-1.01	24.72	-0.8411	-409
209	San Teodoro 3	AM Homo	1560	1560	1499.87	15		2	Europe	Italy	C. B. Ruff, E. Trinkaus, T. W. Holliday, Body mass and encephalization in Pleistocene Homo. Nature. 387, 173-176 (1997). (updated data file provided by Chris Ruff)	Stibel (see Methods for formula)	Mannino et al (2011)	-4.052	-10.008	-9.606	-9.445	-2.58	-5.31458	-1.01	24.72	-0.8411	-409
210	San Teodoro 5	AM Homo	1484	1484	1428.51	15		2	Europe	Italy	C. B. Ruff, E. Trinkaus, T. W. Holliday, Body mass and encephalization in Pleistocene Homo. Nature. 387, 173-176 (1997). (updated data file provided by Chris Ruff)	Stibel (see Methods for formula)	Mannino et al (2011)	-4.052	-10.008	-9.606	-9.445	-2.58	-5.31458	-1.01	24.72	-0.8411	-409
211	San Teodoro 7	AM Homo	1500	1500	1443.54	15		2	Europe	Italy	C. De Miguel, M. Henneberg, Variation in hominid brain size: How much is due to method? Homo. 52, 3-58 (2001).	Stibel (see Methods for formula)	Mannino et al (2011)	-4.052	-10.008	-9.606	-9.445	-2.58	-5.31458	-1.01	24.72	-0.8411	-409
37	Cape Flats	AM Homo	1230	1230	1189.35	15		1	Sub-Saharan Africa	South Africa	K. L. Beals, C. L. Smith, S.M. Dodd, Brain size, cranial morphology, climate, and time machines. Current Anthropology. 3, 301-330 (1984).	Stibel (see Methods for formula)		-4.052	-10.008	-9.606	-9.445	-2.58	-5.31458	-1.01	24.72	-0.8411	-409
269	Wadjak 2	AM Homo	1650	1650	1584.26	15		1	Asia	Indonesia	C. De Miguel, M. Henneberg, Variation in hominid brain size: How much is due to method? Homo. 52, 3-58 (2001).	Stibel (see Methods for formula)		-4.052	-10.008	-9.606	-9.445	-2.58	-5.31458	-1.01	24.72	-0.8411	-409
270	WLH 50 (Willandra Lakes hominid 50)	AM Homo	1540	1540	1481.1	15		2	Australia	Australia	C. De Miguel, M. Henneberg, Variation in hominid brain size: How much is due to method? Homo. 52, 3-58 (2001).	Stibel (see Methods for formula)		-4.052	-10.008	-9.606	-9.445	-2.58	-5.31458	-1.01	24.72	-0.8411	-409
256	Taza 1 (f)	AM Homo	1125	1125	1090.16	16		2	Africa	Algeria	C. De Miguel, M. Henneberg, Variation in hominid brain size: How much is due to method? Homo. 52, 3-58 (2001).	Stibel (see Methods for formula)		-6.114	-9.458	-9.418	-8.529	-8.05	-5.31458	-8.6	22.92	-0.7706	-50.75
27	Brno 1	AM Homo	1600	1600	1537.39	17.5		2	Europe	Czech Republic	C. De Miguel, M. Henneberg, Variation in hominid brain size: How much is due to method? Homo. 52, 3-58 (2001).	Stibel (see Methods for formula)		-9.466	-9.081	-8.901	-8.397	-8.05	-5.31458	-8.6	22.92	-1.0264	-143.16
39	Chancelade 1	AM Homo	1650	1636.67	1571.77	18		2	Europe	France	C. De Miguel, M. Henneberg, Variation in hominid brain size: How much is due to method? Homo. 52, 3-58 (2001).	Stibel (see Methods for formula)	Barshay-Szmidt et al., 2016	-9.314	-9.552	-8.795	-8.909	-8.05	-5.31458	-8.6	20.45	-0.9174	-211.07
26	Brno (female)	AM Homo	1250	1250	1208.22	18	1	2	Europe	Czech Republic	C. De Miguel, M. Henneberg, Variation in hominid brain size: How much is due to method? Homo. 52, 3-58 (2001).	Stibel (see Methods for formula)		-9.314	-9.552	-8.795	-8.909	-8.05	-5.31458	-8.6	20.45	-0.9174	-211.07
28	Brno 2	AM Homo	1543	1543	1483.91	18		2	Europe	Czech Republic	C. De Miguel, M. Henneberg, Variation in hominid brain size: How much is due to method? Homo. 52, 3-58 (2001).	Stibel (see Methods for formula)		-9.314	-9.552	-8.795	-8.909	-8.05	-5.31458	-8.6	20.45	-0.9174	-211.07
202	Saint Germain-la-Riviere (StG-la-R)	AM Homo	1354	1354	1306.24	19	1	2	Europe	France	C. B. Ruff, E. Trinkaus, T. W. Holliday, Body mass and encephalization in Pleistocene Homo. Nature. 387, 173-176 (1997). (updated data file provided by Chris Ruff)	Stibel (see Methods for formula)	Gambier et al., 2000	-9.16	-9.73	-8.579	-9.488	-8.05	-5.31458	-8.6	20.45	-0.4216	-226.61
22	Boskop (Boule M, Vallous HV (1957))	AM Homo	1830	1746.17	1674.32	20	2	1	Sub-Saharan Africa	South Africa	C. De Miguel, M. Henneberg, Variation in hominid brain size: How much is due to method? Homo. 52, 3-58 (2001).	Stibel (see Methods for formula)		-10.008	-9.606	-9.445	-8.083	-8.05	-9.26777	-8.6	23.14	-0.2669	-274.4
133	Minatogawa 1	AM Homo	1390	1390	1340.13	22	2	2	Asia	Japan	C. B. Ruff, E. Trinkaus, T. W. Holliday, Body mass and encephalization in Pleistocene Homo. Nature. 387, 173-176 (1997). (updated data file provided by Chris Ruff)	Stibel (see Methods for formula)	Kaifu et al., 2011	-9.297	-9.825	-7.816	-8.115	-9.37	-9.26777	-8.6	21.09	-0.5229	-136.4
134	Minatogawa 2	AM Homo	1170	1170	1132.69	22	1	2	Asia	Japan	C. B. Ruff, E. Trinkaus, T. W. Holliday, Body mass and encephalization in Pleistocene Homo. Nature. 387, 173-176 (1997). (updated data file provided by Chris Ruff)	Stibel (see Methods for formula)	Kaifu et al., 2011	-9.297	-9.825	-7.816	-8.115	-9.37	-9.26777	-8.6	21.09	-0.5229	-136.4
135	Minatogawa 4	AM Homo	1090	1090	1057.04	22	1	2	Asia	Japan	C. B. Ruff, E. Trinkaus, T. W. Holliday, Body mass and encephalization in Pleistocene Homo. Nature. 387, 173-176 (1997). (updated data file provided by Chris Ruff)	Stibel (see Methods for formula)	Kaifu et al., 2011	-9.297	-9.825	-7.816	-8.115	-9.37	-9.26777	-8.6	21.09	-0.5229	-136.4
83	Fish Hoek 1 (Skildergat cave)	AM Homo	1550	1587.5	1525.67	25.5045		1	Sub-Saharan Africa	South Africa	C. De Miguel, M. Henneberg, Variation in hominid brain size: How much is due to method? Homo. 52, 3-58 (2001).	Stibel (see Methods for formula)		-9.702	-9.034	-7.839	-7.378	-9.17	-9.26777	-8.6	20.92	-0.6669	-161.74
183	Abri Pataud 1	AM Homo	1380	1380	1330.72	27	1	2	Europe	France	C. B. Ruff, E. Trinkaus, T. W. Holliday, Body mass and encephalization in Pleistocene Homo. Nature. 387, 173-176 (1997). (updated data file provided by Chris Ruff)	Stibel (see Methods for formula)	Villotte et al., 2015	-9.825	-7.816	-8.115	-8.723	-9.17	-9.26777	-8.6	20.92	-1.0101	-477
181	Paderborne	AM Homo	1531	1531	1472.65	27.4		2	Europe	Germany	C. B. Ruff, E. Trinkaus, T. W. Holliday, Body mass and encephalization in Pleistocene Homo. Nature. 387, 173-176 (1997). (updated data file provided by Chris Ruff)	Stibel (see Methods for formula)		-8.013	-8.137	-7.353	-7.907	-9.17	-9.26777	-8.6	21.33	-1.0101	-520
10	Arene Candide IP	AM Homo	1490	1490	1434.15	28	2	2	Europe	Italy	C. B. Ruff, E. Trinkaus, T. W. Holliday, Body mass and encephalization in Pleistocene Homo. Nature. 387, 173-176 (1997). (updated data file provided by Chris Ruff)	Stibel (see Methods for formula)	Pettitt et al., 2003	-8.795	-8.909	-6.864	-6.905	-9.17	-9.26777	-8.6	21.33	-1.0433	-402
191	Predmost 10	AM Homo	1452	1452	1398.44	29		2	Europe	Czech Republic	K. L. Beals, C. L. Smith, S.M. Dodd, Brain size, cranial morphology, climate, and time machines. Current Anthropology. 3, 301-330 (1984).	Stibel (see Methods for formula)	Svoboda, 2008	-8.579	-9.488	-6.617	-8.166	-9.17	-9.26777	-8.6	21.33	-0.9036	-460
194	Predmost 9	AM Homo	1555	1555	1495.18	29		2	Europe	Czech Republic	K. L. Beals, C. L. Smith, S.M. Dodd, Brain size, cranial morphology, climate, and time machines. Current Anthropology. 3, 301-330 (1984).	Stibel (see Methods for formula)	Svoboda, 2008	-8.579	-9.488	-6.617	-8.166	-9.17	-9.26777	-8.6	21.33	-0.9036	-460
192	Predmosti 3	AM Homo	1580	1589.33	1527.39	29		2	Europe	Czech Republic	C. De Miguel, M. Henneberg, Variation in hominid brain size: How much is due to method? Homo. 52, 3-58 (2001).	Stibel (see Methods for formula)	Svoboda, 2008	-8.579	-9.488	-6.617	-8.166	-9.17	-9.26777	-8.6	21.33	-0.9036	-460
193	Predmosti 4	AM Homo	1250	1379.5	1330.25	29		2	Europe	Czech Republic	C. De Miguel, M. Henneberg, Variation in hominid brain size: How much is due to method? Homo. 52, 3-58 (2001).	Stibel (see Methods for formula)	Svoboda, 2008	-8.579	-9.488	-6.617	-8.166	-9.17	-9.26777	-8.6	21.33	-0.9036	-460
90	Grotte des Enfants 4 (Grimaldi)	AM Homo	1775	1735	1663.87	30	2	2	Europe	Italy	C. B. Ruff, E. Trinkaus, T. W. Holliday, Body mass and encephalization in Pleistocene Homo. Nature. 387, 173-176 (1997). (updated data file provided by Chris Ruff)	Stibel (see Methods for formula)	Formicola, 2005	-9.445	-8.083	-7.952	-7.623	-9.17	-8.12091	-8.6	22.98	-0.7299	-394
91	Grotte des Enfants 5 (Grimaldi)	AM Homo	1518	1422.67	1370.86	30		2	Europe	Italy	C. De Miguel, M. Henneberg, Variation in hominid brain size: How much is due to method? Homo. 52, 3-58 (2001).	Stibel (see Methods for formula)	Formicola, 2005	-9.445	-8.083	-7.952	-7.623	-9.17	-8.12091	-8.6	22.98	-0.7299	-394
92	Grotte des Enfants 6 (Grimaldi)	AM Homo	1500	1553.33	1493.61	30		2	Europe	Italy	C. De Miguel, M. Henneberg, Variation in hominid brain size: How much is due to method? Homo. 52, 3-58 (2001).	Stibel (see Methods for formula)	Formicola, 2005	-9.445	-8.083	-7.952	-7.623	-9.17	-8.12091	-8.6	22.98	-0.7299	-394
17	Barma Grande 2	AM Homo	1880	1814	1737.77	30	2	2	Europe	Italy	C. B. Ruff, E. Trinkaus, T. W. Holliday, Body mass and encephalization in Pleistocene Homo. Nature. 387, 173-176 (1997). (updated data file provided by Chris Ruff)	Stibel (see Methods for formula)	Formicola et al., 2004	-9.445	-8.083	-7.952	-7.623	-9.17	-8.12091	-8.6	22.98	-0.7299	-394
61	Dolni Vestonice 3	AM Homo	1322	1307.5	1262.44	31	1	2	Europe	Czech Republic	C. B. Ruff, E. Trinkaus, T. W. Holliday, Body mass and encephalization in Pleistocene Homo. Nature. 387, 173-176 (1997). (updated data file provided by Chris Ruff)	Stibel (see Methods for formula)	Svoboda, 2006	-8.529	-8.273	-8.609	-5.163	-8.69	-8.12091	-8.06	22.98	-0.7741	-464
184	Pavlov 1	AM Homo	1522	1522	1464.2	31	2	2	Europe	Czech Republic	C. B. Ruff, E. Trinkaus, T. W. Holliday, Body mass and encephalization in Pleistocene Homo. Nature. 387, 173-176 (1997). (updated data file provided by Chris Ruff)	Stibel (see Methods for formula)	Svoboda et al., 2015	-8.529	-8.273	-8.609	-5.163	-8.69	-8.12091	-8.06	22.98	-0.7741	-464
50	Cro-Magnon 1	AM Homo	1660	1611.5	1548.18	33	2	2	Europe	France	C. De Miguel, M. Henneberg, Variation in hominid brain size: How much is due to method? Homo. 52, 3-58 (2001).	Stibel (see Methods for formula)	Henry-Gambier, 2002	-8.909	-6.864	-6.905	-7.467	-8.69	-8.12091	-8.06	22.89	-0.9165	-261
51	Cro-Magnon 2	AM Homo	1402	1402	1351.42	33		2	Europe	France	C. De Miguel, M. Henneberg, Variation in hominid brain size: How much is due to method? Homo. 52, 3-58 (2001).	Stibel (see Methods for formula)	Henry-Gambier, 2002	-8.909	-6.864	-6.905	-7.467	-8.69	-8.12091	-8.06	22.89	-0.9165	-261
52	Cro-Magnon 3	AM Homo	1730	1730	1659.19	33		2	Europe	France	C. De Miguel, M. Henneberg, Variation in hominid brain size: How much is due to method? Homo. 52, 3-58 (2001).	Stibel (see Methods for formula)	Henry-Gambier, 2002	-8.909	-6.864	-6.905	-7.467	-8.69	-8.12091	-8.06	22.89	-0.9165	-261
282	Zhoukoudian 101 (Up. Cave 1, Shandingdong)	AM Homo	1500	1500	1443.54	35		2	Asia	China	C. De Miguel, M. Henneberg, Variation in hominid brain size: How much is due to method? Homo. 52, 3-58 (2001).	Stibel (see Methods for formula)	Norton and Gao, 2008	-8.083	-7.952	-7.623	-7.549	-8.69	-8.12091	-8.06	22.89	-0.7706	-647
283	Zhoukoudian 102 (Up. Cave 2, Shandingdong)	AM Homo	1380	1380	1330.72	35		2	Asia	China	C. De Miguel, M. Henneberg, Variation in hominid brain size: How much is due to method? Homo. 52, 3-58 (2001).	Stibel (see Methods for formula)	Norton and Gao, 2008	-8.083	-7.952	-7.623	-7.549	-8.69	-8.12091	-8.06	22.89	-0.7706	-647
284	Zhoukoudian 103 (Up. Cave 3, Shandingdong)	AM Homo	1290	1295	1250.66	35		2	Asia	China	C. De Miguel, M. Henneberg, Variation in hominid brain size: How much is due to method? Homo. 52, 3-58 (2001).	Stibel (see Methods for formula)	Norton and Gao, 2008	-8.083	-7.952	-7.623	-7.549	-8.69	-8.12091	-8.06	22.89	-0.7706	-647
80	Eyasi (listed as a range 1220 - 1250)	AM Homo	1235	1235	1194.07	35		1	Africa	Tanzania	C. De Miguel, M. Henneberg, Variation in hominid brain size: How much is due to method? Homo. 52, 3-58 (2001).	Stibel (see Methods for formula)		-8.083	-7.952	-7.623	-7.549	-8.69	-8.12091	-8.06	22.89	-0.7706	-647
136	Mladec 5 (Lautsch)	AM Homo	1500	1575	1513.94	35	2	2	Europe	Czech Republic	C. B. Ruff, E. Trinkaus, T. W. Holliday, Body mass and encephalization in Pleistocene Homo. Nature. 387, 173-176 (1997). (updated data file provided by Chris Ruff)	Stibel (see Methods for formula)	Wild et al., 2005	-8.083	-7.952	-7.623	-7.549	-8.69	-8.12091	-8.06	22.89	-0.7706	-647
144	Nazlet Khater 2	AM Homo	1420	1420	1368.35	38	2	1	Africa	Egypt	C. B. Ruff, E. Trinkaus, T. W. Holliday, Body mass and encephalization in Pleistocene Homo. Nature. 387, 173-176 (1997). (updated data file provided by Chris Ruff)	Stibel (see Methods for formula)	Vermeersch, 2002	-6.864	-6.905	-7.467	-6.593	-7.55	-8.12091	-8.06	21.71	-0.5078	-216
79	Galilee	Archaic Homo	1400	1400	1349.54	40		2	Asia	Israel	C. De Miguel, M. Henneberg, Variation in hominid brain size: How much is due to method? Homo. 52, 3-58 (2001).	Stibel (see Methods for formula)		-7.952	-7.623	-7.549	-6.479	-7.55	-7.36895	-8.06	21.39	-0.4633	38
240	Spy 1	Archaic Homo	1305	1431.71	1379.37	41		2	Europe	Belgium	Holloway (1981); Beals, Smith, Dodd (1984); De Miguel, Henneberg (2001); Ruff, Trinkaus, Holliday (1997) (updated data file provided by lead author)	Stibel (see Methods for formula)	Ruff, Burgess, Squyres, Junno, Trinkaus (2018)	-8.609	-5.163	-7.152	-8.057	-7.96	-7.36895	-8.06	21.39	-0.3811
241	Spy 2	Archaic Homo	1553	1518.33	1460.76	41		2	Europe	Belgium	Hawks, Wolfpoff (2001); Holloway (1981); Beals, Smith, Dodd (1984); De Miguel, Henneberg (2001); Ruff, Trinkaus, Holliday (1997) (updated data file provided by lead author)	Stibel (see Methods for formula)	Ruff, Burgess, Squyres, Junno, Trinkaus (2018)	-8.609	-5.163	-7.152	-8.057	-7.96	-7.36895	-8.06	21.39	-0.3811
131	Le Moustier	Archaic Homo	1564	1478.14	1423.01	43.1429		2	Europe	France	D. Hawks, M. H. Wolfpoff, The accretion model of Neandertal evolution. Evolution. 55, 1474-1485 (2001).	Stibel (see Methods for formula)		-6.86	-8.193	-5.503	-5.778	-7.96	-7.36895	-8.06	21.76	-0.4254
82	Feldhofer 1	Archaic Homo	1525	1525	1467.02	44	2	2	Europe	Germany	Hawks, Wolfpoff (2001)	Stibel (see Methods for formula)	Schmitz et al., 2002	-8.166	-6.831	-6.225	-5.841	-7.96	-7.36895	-8.06	21.76	-0.2311
126	La Ferrassie 1	Archaic Homo	1600	1651.75	1585.9	44	2	2	Europe	France	Hawks, Wolfpoff (2001); Beals, Smith, Dodd (1984); De Miguel, Henneberg (2001)	Stibel (see Methods for formula)	Guérin et al., 2015	-8.166	-6.831	-6.225	-5.841	-7.96	-7.36895	-8.06	21.76	-0.2311
263	Tuinplaas	AM Homo	1589	1556.33	1496.43	45.673	2	1	Sub-Saharan Africa	South Africa	M. J. Henneberg, M. Steyn, Trends in cranial capacity and cranial index in Subsaharan Africa during the Holocene. American Journal of Human Biology. 5, 473-479 (1993).	Stibel (see Methods for formula)		-6.253	-7.466	-7.399	-6.184	-6.78	-7.36895	-6.78	21.52	-0.1466
128	La Quina 5 (H5)	Archaic Homo	1307	1342.8	1295.69	49		2	Europe	France	C. De Miguel, M. Henneberg, Variation in hominid brain size: How much is due to method? Homo. 52, 3-58 (2001).	Stibel (see Methods for formula)		-6.831	-6.225	-5.841	-7.558	-6.78	-7.36895	-6.78	21.6	-0.5352
125	La Chappelle-aux-Saints 1	Archaic Homo	1626	1610.25	1547	50	2	2	Europe	France	C. De Miguel, M. Henneberg, Variation in hominid brain size: How much is due to method? Homo. 52, 3-58 (2001).	Stibel (see Methods for formula)	Guérin et al., 2012	-7.549	-6.479	-6.42	-8.812	-6.78	-6.42039	-6.78	21.6	-0.2163
221	Shanidar 1	Archaic Homo	1600	1633.33	1568.64	50	2	2	Asia	Iraq	C. B. Ruff, E. Trinkaus, T. W. Holliday, Body mass and encephalization in Pleistocene Homo. Nature. 387, 173-176 (1997). (updated data file provided by Chris Ruff)	Stibel (see Methods for formula)	Pomeroy et al., 2020	-7.549	-6.479	-6.42	-8.812	-6.78	-6.42039	-6.78	21.6	-0.2163
Alternate measurements (averaged into mean Cranial Capacity and dates, where precise estimates were not available)
Skull #	Sample Name / Specimen	Cranial Capacity (cm3)			Standardized Date (kyr BP)		Sex (1 = female)	Location Key (continent data)	Region / Lat. (1 = low = < 30 degrees)	Location (Continent)	Location 2 (Country	Location 3 (City/Site Name)	Source
7	Amud 1	1740			28		2	6		Asia	Israel	Wadi Amud	K. L. Beals, C. L. Smith, S.M. Dodd, Brain size, cranial morphology, climate, and time machines. Current Anthropology. 3, 301-330 (1984).
7	Amud 1	1750			45		2	6		Asia	Israel	Wadi Amud	C. B. Ruff, E. Trinkaus, T. W. Holliday, Body mass and encephalization in Pleistocene Homo. Nature. 387, 173-176 (1997). (updated data file provided by Chris Ruff)
7	Amud 1	1740			28		2	6		Asia	Israel	Wadi Amud	K. L. Beals, C. L. Smith, S.M. Dodd, Brain size, cranial morphology, climate, and time machines. Current Anthropology. 3, 301-330 (1984).
7	Amud 1	1750			45		2	6		Asia	Israel	Wadi Amud	C. B. Ruff, E. Trinkaus, T. W. Holliday, Body mass and encephalization in Pleistocene Homo. Nature. 387, 173-176 (1997). (updated data file provided by Chris Ruff)
17	Barma Grande 2	1748			19			7		Europe	Italy	Grimaldi	C. De Miguel, M. Henneberg, Variation in hominid brain size: How much is due to method? Homo. 52, 3-58 (2001).
22	Boskop (Broom, R. The Boskop Skull (Amer. Mus. of Nat. Hist. Anthropological Papers XXIII, 1918))	1950			20			1		Sub-Saharan Africa	South Africa	Transvaal	C. De Miguel, M. Henneberg, Variation in hominid brain size: How much is due to method? Homo. 52, 3-58 (2001).
22	Boskop (Pycraft, W. On the Calvaria found at Boskop, Transvaal in 1913 and its Relationship to Cromagnard and Negroid Skulls. J of the Roy. Anthop. Inst., LV, 1925)	1717			20			1		Sub-Saharan Africa	South Africa	Transvaal	C. De Miguel, M. Henneberg, Variation in hominid brain size: How much is due to method? Homo. 52, 3-58 (2001).
22	Boskop	1700			20			1		Sub-Saharan Africa	South Africa	Transvaal	C. De Miguel, M. Henneberg, Variation in hominid brain size: How much is due to method? Homo. 52, 3-58 (2001).
22	Boskop	1630			20			1		Sub-Saharan Africa	South Africa	Transvaal	C. De Miguel, M. Henneberg, Variation in hominid brain size: How much is due to method? Homo. 52, 3-58 (2001).
22	Boskop	1650			20			1		Sub-Saharan Africa	South Africa	Transvaal	C. De Miguel, M. Henneberg, Variation in hominid brain size: How much is due to method? Homo. 52, 3-58 (2001).
27	Brno 1	1600			17		1	7		Europe	Czech Republic	Brno	K. L. Beals, C. L. Smith, S.M. Dodd, Brain size, cranial morphology, climate, and time machines. Current Anthropology. 3, 301-330 (1984).
39	Chancelade	1700			12		2	7		Europe	France	Chancelade	C. B. Ruff, E. Trinkaus, T. W. Holliday, Body mass and encephalization in Pleistocene Homo. Nature. 387, 173-176 (1997). (updated data file provided by Chris Ruff)
39	Chancelade 1	1710			13			7		Europe	France	Chancelade	C. De Miguel, M. Henneberg, Variation in hominid brain size: How much is due to method? Homo. 52, 3-58 (2001).
39	Chancelade 1	1530			13			7		Europe	France	Chancelade	C. De Miguel, M. Henneberg, Variation in hominid brain size: How much is due to method? Homo. 52, 3-58 (2001).
39	Chancelade 1	1700			13			7		Europe	France	Chancelade	C. De Miguel, M. Henneberg, Variation in hominid brain size: How much is due to method? Homo. 52, 3-58 (2001).
39	Chancelade	1530			14			7		Europe	France	Chancelade	K. L. Beals, C. L. Smith, S.M. Dodd, Brain size, cranial morphology, climate, and time machines. Current Anthropology. 3, 301-330 (1984).
48	Cohuna	1260			10		2	8		Australia	Australia	Cohuna	K. L. Beals, C. L. Smith, S.M. Dodd, Brain size, cranial morphology, climate, and time machines. Current Anthropology. 3, 301-330 (1984).
49	Combe Capelle	1440			25		2	7		Europe	France	Perigord	K. L. Beals, C. L. Smith, S.M. Dodd, Brain size, cranial morphology, climate, and time machines. Current Anthropology. 3, 301-330 (1984).
50	Cro Magnon	1590			22		2	7		Europe	France	Cro-Magnon	K. L. Beals, C. L. Smith, S.M. Dodd, Brain size, cranial morphology, climate, and time machines. Current Anthropology. 3, 301-330 (1984).
50	Cro-Magnon 1	1590			30		2	7		Europe	France	Cro-Magnon	C. De Miguel, M. Henneberg, Variation in hominid brain size: How much is due to method? Homo. 52, 3-58 (2001).
50	Cro-Magnon 1	1636			30		2	7		Europe	France	Cro-Magnon	C. De Miguel, M. Henneberg, Variation in hominid brain size: How much is due to method? Homo. 52, 3-58 (2001).
50	Cro-Magnon 1	1600			30		2	7		Europe	France	Cro-Magnon	C. B. Ruff, E. Trinkaus, T. W. Holliday, Body mass and encephalization in Pleistocene Homo. Nature. 387, 173-176 (1997). (updated data file provided by Chris Ruff)
50	Cro-Magnon 1	1593			30		2	7		Europe	France	Cro-Magnon	C. De Miguel, M. Henneberg, Variation in hominid brain size: How much is due to method? Homo. 52, 3-58 (2001).
61	Dolni Vestonice 3	1293			26			7		Europe	Czech Republic	Dolni Vestonice, Moravia	C. De Miguel, M. Henneberg, Variation in hominid brain size: How much is due to method? Homo. 52, 3-58 (2001).
83	Fish Hoek 1 (Skildergat cave)	1600			14			1		Sub-Saharan Africa	South Africa	Fish Hoek	C. De Miguel, M. Henneberg, Variation in hominid brain size: How much is due to method? Homo. 52, 3-58 (2001).
83	Fish Hoek 1	1600			36		2	1		Sub-Saharan Africa	South Africa	Fish Hoek	K. L. Beals, C. L. Smith, S.M. Dodd, Brain size, cranial morphology, climate, and time machines. Current Anthropology. 3, 301-330 (1984).
83	Vishoek (Drennan 1929 - not original for this skull)	1600			38.018		2	1		Sub-Saharan Africa	South Africa	Fish Hoek	M. J. Henneberg, M. Steyn, Trends in cranial capacity and cranial index in Subsaharan Africa during the Holocene. American Journal of Human Biology. 5, 473-479 (1993).
90	Grotte des Enfants 4 (Grimaldi)	1715			28			7		Europe	Italy	Grimaldi	C. De Miguel, M. Henneberg, Variation in hominid brain size: How much is due to method? Homo. 52, 3-58 (2001).
90	G. Des Enfants 4	1715			32		2	7		Europe	Italy	Grimaldi	K. L. Beals, C. L. Smith, S.M. Dodd, Brain size, cranial morphology, climate, and time machines. Current Anthropology. 3, 301-330 (1984).
91	Grotte des Enfants 5	1375			28		1	7		Europe	Italy	Grimaldi	C. B. Ruff, E. Trinkaus, T. W. Holliday, Body mass and encephalization in Pleistocene Homo. Nature. 387, 173-176 (1997). (updated data file provided by Chris Ruff)
91	G. Des Enfants 5	1375			32		1	7		Europe	Italy	Grimaldi	K. L. Beals, C. L. Smith, S.M. Dodd, Brain size, cranial morphology, climate, and time machines. Current Anthropology. 3, 301-330 (1984).
92	Grotte des Enfants 6	1580			28		2	7		Europe	Italy	Grimaldi	C. B. Ruff, E. Trinkaus, T. W. Holliday, Body mass and encephalization in Pleistocene Homo. Nature. 387, 173-176 (1997). (updated data file provided by Chris Ruff)
92	G. Des Enfants 6	1580			32		2	7		Europe	Italy	Grimaldi	K. L. Beals, C. L. Smith, S.M. Dodd, Brain size, cranial morphology, climate, and time machines. Current Anthropology. 3, 301-330 (1984).
111	Keilor 1	1593			13		2	8		Australia	Australia	Keilor	K. L. Beals, C. L. Smith, S.M. Dodd, Brain size, cranial morphology, climate, and time machines. Current Anthropology. 3, 301-330 (1984).
125	La Chapelle	1600			40		2	7		Europe	France	La Chappelle-aux-Saints	K. L. Beals, C. L. Smith, S.M. Dodd, Brain size, cranial morphology, climate, and time machines. Current Anthropology. 3, 301-330 (1984).
125	La Chappelle-aux-Saints	1610			50		2	7		Europe	France	La Chappelle-aux-Saints	C. De Miguel, M. Henneberg, Variation in hominid brain size: How much is due to method? Homo. 52, 3-58 (2001).
125	La Chappelle-aux-Saints (listed as a range 1550 - 1600)	1575			50		2	7		Europe	France	La Chappelle-aux-Saints	C. De Miguel, M. Henneberg, Variation in hominid brain size: How much is due to method? Homo. 52, 3-58 (2001).
125	La Chappelle-aux-Saints	1620			50		2	7		Europe	France	La Chappelle-aux-Saints	C. De Miguel, M. Henneberg, Variation in hominid brain size: How much is due to method? Homo. 52, 3-58 (2001).
125	La Chappelle-aux-Saints	1625			50		2	7		Europe	France	La Chappelle-aux-Saints	C. De Miguel, M. Henneberg, Variation in hominid brain size: How much is due to method? Homo. 52, 3-58 (2001).
125	La Chappelle-aux-Saints	1600			50		2	7		Europe	France	La Chappelle-aux-Saints	C. De Miguel, M. Henneberg, Variation in hominid brain size: How much is due to method? Homo. 52, 3-58 (2001).
128	La Quina H5 (Note: Sex Doubtful, Adult)	1345			45		2	7		Europe	France	La Quina Rock Shelter	K. L. Beals, C. L. Smith, S.M. Dodd, Brain size, cranial morphology, climate, and time machines. Current Anthropology. 3, 301-330 (1984).
128	La Quina 5	1367			50			7		Europe	France	La Quina Rock Shelter	C. De Miguel, M. Henneberg, Variation in hominid brain size: How much is due to method? Homo. 52, 3-58 (2001).
128	La Quina 5	1350			50			7		Europe	France	La Quina Rock Shelter	C. B. Ruff, E. Trinkaus, T. W. Holliday, Body mass and encephalization in Pleistocene Homo. Nature. 387, 173-176 (1997). (updated data file provided by Chris Ruff)
128	La Quina 5	1345			50			7		Europe	France	La Quina Rock Shelter	C. De Miguel, M. Henneberg, Variation in hominid brain size: How much is due to method? Homo. 52, 3-58 (2001).
131	Le Moustier 1	1350			40			7		Europe	France	Dordogne	C. De Miguel, M. Henneberg, Variation in hominid brain size: How much is due to method? Homo. 52, 3-58 (2001).
131	Le Moustier 1	1600			40		2	7		Europe	France	Dordogne	C. B. Ruff, E. Trinkaus, T. W. Holliday, Body mass and encephalization in Pleistocene Homo. Nature. 387, 173-176 (1997). (updated data file provided by Chris Ruff)
131	Le Moustier 1	1564			40			7		Europe	France	Dordogne	C. De Miguel, M. Henneberg, Variation in hominid brain size: How much is due to method? Homo. 52, 3-58 (2001).
131	Le Moustier 1	1352			40			7		Europe	France	Dordogne	C. De Miguel, M. Henneberg, Variation in hominid brain size: How much is due to method? Homo. 52, 3-58 (2001).
131	Le Moustier 1	1565			40			7		Europe	France	Dordogne	C. De Miguel, M. Henneberg, Variation in hominid brain size: How much is due to method? Homo. 52, 3-58 (2001).
136	Mladec 5 (Lautsch)	1650			35			7		Europe	Czech Republic	Mladec	C. De Miguel, M. Henneberg, Variation in hominid brain size: How much is due to method? Homo. 52, 3-58 (2001).
156	Oberk1	1500			12		2	7		Europe	Germany	Dusseldorf-Oberkassel	C. B. Ruff, E. Trinkaus, T. W. Holliday, Body mass and encephalization in Pleistocene Homo. Nature. 387, 173-176 (1997). (updated data file provided by Chris Ruff)
157	Oberkassel 2	1306			12			7		Europe	Germany	Dusseldorf-Oberkassel	C. De Miguel, M. Henneberg, Variation in hominid brain size: How much is due to method? Homo. 52, 3-58 (2001).
191	Predm10	1452			26.5		1	7		Europe	Czech Republic	Predmosti, Moravia	C. B. Ruff, E. Trinkaus, T. W. Holliday, Body mass and encephalization in Pleistocene Homo. Nature. 387, 173-176 (1997). (updated data file provided by Chris Ruff)
192	Predmost 3	1580			26		2	7		Europe	Czech Republic	Predmosti, Moravia	K. L. Beals, C. L. Smith, S.M. Dodd, Brain size, cranial morphology, climate, and time machines. Current Anthropology. 3, 301-330 (1984).
192	Predm3	1608			26.5		2	7		Europe	Czech Republic	Predmosti, Moravia	C. B. Ruff, E. Trinkaus, T. W. Holliday, Body mass and encephalization in Pleistocene Homo. Nature. 387, 173-176 (1997). (updated data file provided by Chris Ruff)
193	Predmost 4	1250			26			7		Europe	Czech Republic	Predmosti, Moravia	K. L. Beals, C. L. Smith, S.M. Dodd, Brain size, cranial morphology, climate, and time machines. Current Anthropology. 3, 301-330 (1984).
193	Predm4	1518			26.5		1	7		Europe	Czech Republic	Predmosti, Moravia	C. B. Ruff, E. Trinkaus, T. W. Holliday, Body mass and encephalization in Pleistocene Homo. Nature. 387, 173-176 (1997). (updated data file provided by Chris Ruff)
193	Predmosti 4	1500			27			7		Europe	Czech Republic	Predmosti, Moravia	C. De Miguel, M. Henneberg, Variation in hominid brain size: How much is due to method? Homo. 52, 3-58 (2001).
194	Predm9	1555			26.5		1	7		Europe	Czech Republic	Predmosti, Moravia	C. B. Ruff, E. Trinkaus, T. W. Holliday, Body mass and encephalization in Pleistocene Homo. Nature. 387, 173-176 (1997). (updated data file provided by Chris Ruff)
196	Quafzeh 6 (Note: Jebel Kafzeh)	1568			37		2	6		Asia	Israel	Jebel Qafzeh	K. L. Beals, C. L. Smith, S.M. Dodd, Brain size, cranial morphology, climate, and time machines. Current Anthropology. 3, 301-330 (1984).
221	Shanidar 1	1600			47		2	6		Asia	Iraq	Sahnidar	K. L. Beals, C. L. Smith, S.M. Dodd, Brain size, cranial morphology, climate, and time machines. Current Anthropology. 3, 301-330 (1984).
221	Shanidar 1	1700			50		2	6		Asia	Iraq	Shanidar	C. De Miguel, M. Henneberg, Variation in hominid brain size: How much is due to method? Homo. 52, 3-58 (2001).
255	Talgai 1 (Note: Adolescent, CC +5%)	1370			12		2	8		Australia	Australia	Queensland	K. L. Beals, C. L. Smith, S.M. Dodd, Brain size, cranial morphology, climate, and time machines. Current Anthropology. 3, 301-330 (1984).
263	Tuinplass, (Springbok)	1540			15			1		Sub-Saharan Africa	South Africa	Tuinplaas	C. De Miguel, M. Henneberg, Variation in hominid brain size: How much is due to method? Homo. 52, 3-58 (2001).
264	Tze Yang 1	1210			10		1	6		Asia	China	Tzeyang	K. L. Beals, C. L. Smith, S.M. Dodd, Brain size, cranial morphology, climate, and time machines. Current Anthropology. 3, 301-330 (1984).
268	Wadjak 1	1550			10		1	6		Asia	Indonesia	Java	K. L. Beals, C. L. Smith, S.M. Dodd, Brain size, cranial morphology, climate, and time machines. Current Anthropology. 3, 301-330 (1984).
268	Wadjak 1	1475			15			6		Asia	Indonesia	Java	C. De Miguel, M. Henneberg, Variation in hominid brain size: How much is due to method? Homo. 52, 3-58 (2001).
268	Wadjak 1	1550			15			6		Asia	Indonesia	Java	C. De Miguel, M. Henneberg, Variation in hominid brain size: How much is due to method? Homo. 52, 3-58 (2001).
269	Wadjak 2	1650			15		1	6		Asia	Indonesia	Java	K. L. Beals, C. L. Smith, S.M. Dodd, Brain size, cranial morphology, climate, and time machines. Current Anthropology. 3, 301-330 (1984).
282	Choukoutien 101 (Note: Upper Cave)	1500			18			6		Asia	China	Zhoukoudian	C. B. Ruff, E. Trinkaus, T. W. Holliday, Body mass and encephalization in Pleistocene Homo. Nature. 387, 173-176 (1997). (updated data file provided by Chris Ruff)
283	Choukoutien 102 (Note: Upper Cave)	1380			18			6		Asia	China	Zhoukoudian	C. B. Ruff, E. Trinkaus, T. W. Holliday, Body mass and encephalization in Pleistocene Homo. Nature. 387, 173-176 (1997). (updated data file provided by Chris Ruff)
284	Choukoutien 103 (Note: Upper Cave)	1300			18		1	6		Asia	China	Zhoukoudian	K. L. Beals, C. L. Smith, S.M. Dodd, Brain size, cranial morphology, climate, and time machines. Current Anthropology. 3, 301-330 (1984).
284	ZHD-UC3	1290			18		1	6		Asia	China	Zhoukoudian	C. B. Ruff, E. Trinkaus, T. W. Holliday, Body mass and encephalization in Pleistocene Homo. Nature. 387, 173-176 (1997). (updated data file provided by Chris Ruff)
284	Zhoukoudian 103 (Up. Cave 3, Shandingdong)	1300			27			6		Asia	China	Zhoukoudian	C. De Miguel, M. Henneberg, Variation in hominid brain size: How much is due to method? Homo. 52, 3-58 (2001).
294	Gamble's Cave 5	1530			10			1		Sub-Saharan Africa	Kenya	Elmenteita	C. De Miguel, M. Henneberg, Variation in hominid brain size: How much is due to method? Homo. 52, 3-58 (2001).
